## 24 **Abstract**

25 Huntington's disease (HD), a genetic neurodegenerative disorder, primarily impacts the striatum  
26 and cortex with progressive loss of medium-sized spiny neurons (MSNs) and pyramidal neurons,  
27 disrupting cortico-striatal circuitry. A promising regenerative therapeutic strategy of transplanting  
28 human neural stem cells (hNSCs) is challenged by the need for long-term functional integration.  
29 We previously described that hNSCs transplanted into the striatum of HD mouse models  
30 differentiated into electrophysiologically active immature neurons, improving behavior and  
31 biochemical deficits. Here we show that 8-month implantation of hNSCs into the striatum of  
32 zQ175 HD mice ameliorates behavioral deficits, increases brain-derived neurotrophic factor  
33 (BDNF) and reduces mutant Huntingtin (mHTT) accumulation. Patch clamp recordings,  
34 immunohistochemistry and electron microscopy demonstrates that hNSCs differentiate into  
35 diverse neuronal populations, including MSN- and interneuron-like cells. Remarkably, hNSCs  
36 receive synaptic inputs, innervate host neurons, and improve membrane and synaptic properties.  
37 Overall, the findings support hNSC transplantation for further evaluation and clinical development  
38 for HD.

39

## 40 **Introduction**

41 Huntington's disease (HD) is a devastating neurodegenerative disorder that typically strikes  
42 individuals in midlife and progresses over 15-20 years before patients succumb to the disease  
43 (Ghosh and Tabrizi, 2018). HD is caused by an autosomal dominant CAG (glutamine) repeat  
44 expansion in the *huntingtin* (*HTT*) gene (The Huntington's Disease Collaborative Research Group,  
45 1993). Symptoms include progressive movement abnormalities, most notably chorea, difficulties  
46 with daily tasks, cognitive decline and psychiatric manifestations including depression, memory

47 loss, and eventually dementia (Bates et al., 2002; Harper and Jones, 2002). Neuropathologically,  
48 the disease substantially impacts the striatum and cerebral cortex, with progressive loss of  
49 medium-sized spiny neurons (MSNs) and cortical pyramidal neurons, as well as loss of cortico-  
50 striatal synapses, leading to severe atrophy (Vonsattel and DiFiglia, 1998; Waldvogel et al., 2015).  
51 At the molecular level, the disease is accompanied by progressive loss of neuronal proteins,  
52 including brain-derived neurotrophic factor (BDNF) that supports survival of striatal neurons, as  
53 well as aberrant accumulation of aggregated huntingtin (HTT) protein species that correspond to  
54 disease pathogenesis (Saudou and Humbert, 2016). There is currently no FDA approved disease  
55 modifying treatments for HD patients that can either delay onset or modify disease progression.  
56 Recent strategies that show promise include DNA-targeting techniques such as zinc-finger proteins  
57 and CRISPR/Cas9, as well as HTT-lowering techniques currently in clinical trials, such as RNAi  
58 and antisense oligonucleotides (Tabrizi et al., 2019). However, these strategies also have  
59 limitations including efficient and targeted delivery, as well as the inability to replace or  
60 compensate for neuronal loss. Thus, there is an urgent need to finding additional therapeutic  
61 approaches.

62 In recent years, there has been an explosion of studies in regenerative medicine. The use  
63 of neural stem cells (NSCs) for the treatment of neurological disorders is in the early stages but  
64 there is already a wealth of information indicating that NSCs may offer a viable therapeutic avenue  
65 (El-Akabawy et al., 2012; Choi and Hong, 2017; Connor, 2018). We recently demonstrated that  
66 human (h)NSCs implanted in the striatum of R6/2 mice, a severe and rapidly progressing model  
67 of HD akin to juvenile HD (Mangiarini et al., 1996), survive, are functional, and improve a number  
68 of HD phenotypes (Holley et al., 2018; Reidling et al., 2018). Studies also included the long-lived  
69 full-length homozygous Q140 HD mouse model and we showed behavioral improvements and

70 reduced aggregation; however, characterization of cells was limited due to low cell survival rate,  
71 perhaps caused by insufficient immunosuppression methods. Therefore, in the present study, we  
72 determined whether hNSCs can survive for longer periods of time, the types of cells they  
73 differentiate into in the host brain, whether cells are electrophysiologically active, whether they  
74 make connections with host cells and if neuroprotective effects persist. For these purposes, we  
75 used the heterozygous zQ175 mouse model that recapitulates aspects of adult-onset HD (Menalled  
76 et al., 2012). Heterozygous mice do not show overt behavioral symptoms until approximately 6  
77 months of age and become fully symptomatic at 8-12 months (Heikkinen et al., 2012).  
78 Electrophysiological studies have demonstrated altered passive and active membrane properties of  
79 MSNs in symptomatic animals, as well as changes in synaptic activity (Heikkinen et al., 2012;  
80 Plotkin et al., 2014; Indersmitten et al., 2015; Southwell et al., 2016; Sepers et al., 2018). These  
81 functional alterations are associated with significant loss of neuron spines. Here we tested the  
82 viability, morphological and electrophysiological properties of hNSCs, as well as their potential  
83 therapeutic benefits in zQ175 mice. hNSCs were implanted in the striatum of pre-symptomatic  
84 mice (2.5 months), behavioral tests were performed for 8 months, electrophysiological tests began  
85 when the mice became fully symptomatic (10.5 months of age) and tissue was collected for  
86 immunohistochemical, biochemical, and morphological analyses. Our data show that implanted  
87 hNSCs survive, and a subset differentiate into mature MSNs and interneurons, establish  
88 connections with the host neurons, and rescue specific electrophysiological and behavioral  
89 phenotypes.

90

91

92

93 **Results**

94 **ESI-017 hNSCs Transplanted Long-Term in zQ175 HD Model Mice Engraft and**

95 **Differentiate:** Our previous studies showed beneficial effects of hNSC implantation in R6/2 and

96 Q140 model mice (Holley et al., 2018; Reidling et al., 2018). Here we wished to comprehensively

97 evaluate whether hNSCs could survive for extended periods of time, whether they could further

98 differentiate, and whether they could functionally compensate for loss of connectivity and neuronal

99 function, which has not yet been described in a genetic model of HD. GMP-grade ESI-017 hNSCs

100 (Holley et al., 2018; Reidling et al., 2018) were acquired as frozen aliquots (UC Davis), thawed,

101 and cultured without passaging using the same media reagents as in the GMP facility. Mice were

102 dosed by intrastriatal stereotactic delivery of 100,000 hNSCs per hemisphere at 2.5 months of age.

103 To examine long-term survival of hNSCs, zQ175 mice were sacrificed at 10.5 months of age (8

104 months post-implant). The fate of the implanted cells was determined using IHC with markers for

105 human cells, neural progenitor cells, post-mitotic neurons, astrocytes and oligodendrocytes.

106 Implanted ESI-017 hNSCs survived and remained in the striatum with little migration away from

107 the needle tract in most mice. When proliferative hNSCs are implanted into mice they are non-

108 proliferative 8 months post-implant as indicated by a lack of staining for the proliferation marker

109 Ki67 or when analyzed for the incorporation of the nucleotide analog EdU (**Fig. 1A & B**).

110 Implanted hNSCs also did not express the neural stem cell marker nestin (**Fig. 1C**), supporting

111 that they have differentiated. A survey of cell markers revealed that the implanted hNSCs

112 differentiated into previously observed lineages of immature neurons (doublecortin, DCX+, **Fig.**

113 **1D & E**), very few astrocytes (glial fibrillary acidic protein, GFAP+, **Fig. 1C**), but not

114 oligodendrocytes. Some cells appeared to differentiate into mature neurons (neuronal nuclei,

115 NeuN+, **Fig. 1D, E & I** and BetaIII tubulin+, **Fig. 1G**) or interneurons (calretinin, CR+, **Fig. 1F**,

116 or glutamic acid decarboxylase 65/67, Gad65/67+, **Fig. 1G**). We also detected glutamate  
117 transporter, vGlut1+ puncta surrounding implants potentially from cortical terminals (**Fig. 1F**).  
118 hNSCs also differentiated into MSNs (dopamine- and cAMP-regulated neuronal phosphoprotein,  
119 DARPP32+ and B-cell lymphoma/leukemia 11B, Ct1p2+ **Fig. 1H, I & J**). In addition, there is  
120 evidence that some hNSCs differentiated into cell types that exhibit inhibitory neuronal signals  
121 (gamma-aminobutyric acid, GABA+ **Fig. 1J**). These longer duration survival studies suggest that,  
122 given enough time, the hNSCs are no longer proliferative and can differentiate into post-mitotic  
123 neurons typically found in striatum.

124         After analysis of multiple brain sections, we observed evidence of some cell migration on  
125 the white matter tracts between the striatum and cortex (~50% of the zQ175 but only a few WT  
126 mice). In addition, a subset of these mice that displayed cell migration (~30% overall of implanted  
127 mice) exhibited nodules of cells that were positive for the human marker Ku80 adjacent to the cells  
128 in the implant site and in the ventricular space, but not in the striatum. H&E stains on adjacent  
129 sections of tissue (**Fig. 1K & L**) were performed and cytologically the cells in the nodules appeared  
130 to be mostly well-differentiated, mature-looking neurons. No evidence of proliferation was  
131 observed using Ki67 and nestin staining, suggesting these nodules are not a cause of concern in  
132 terms of potential for being or forming metastatic tumors. We performed IHC on another cohort  
133 of zQ175 and WT mice at 1, 2 and 5 months post implant in an attempt to observe the formation  
134 of nodules over time but did not observe any nodule formation. Between implantation of the  
135 original cohort and the nodule test mice we made a minor improvement to the surgical apparatus  
136 that may have altered hNSC migration on white matter tracks.



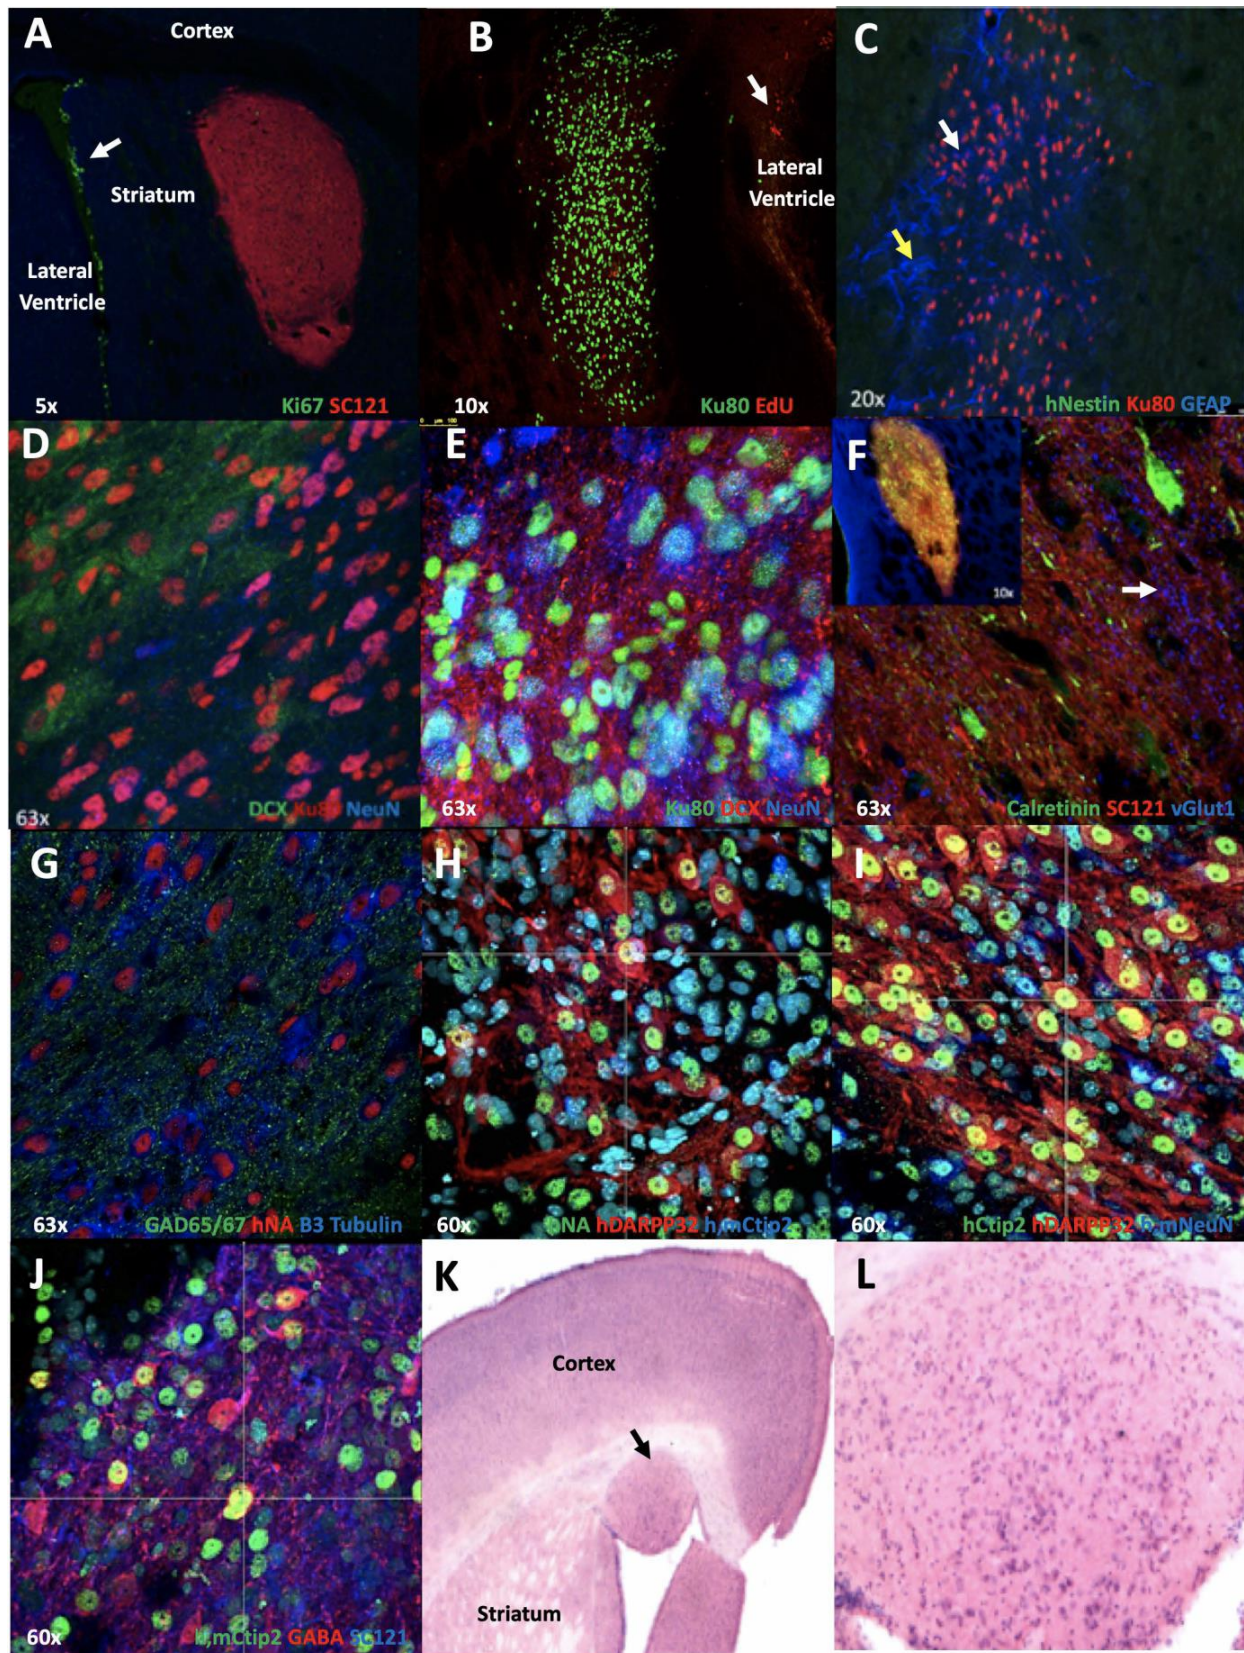

137

138

139 **Figure 1: ESI-017 hNSCs implanted in zQ175 mice differentiate and do not proliferate:** A)  
140 5x mag. hNSCs (human cytosolic marker SC121, red) in zQ175 mice do not express the  
141 proliferation marker Ki67 (green). Proliferating cells in the lateral ventricle are indicated by arrow.  
142 **B)** 10X mag. showing hNSCs (human nuclear marker Ku80, green) did not incorporate the  
143 nucleotide analog EdU 24 hrs post injection indicating they are not dividing. **C)** 20x shows hNSCs  
144 (Ku80, red) do not express the neuronal progenitor marker nestin (green) but some cells show  
145 expression of the astrocyte marker GFAP (blue, white arrow). The hNSC implant site is  
146 surrounded by a mouse glial cell scar (GFAP+ blue, yellow arrow). **D)** hNSCs (Ku80, red)  
147 differentiate into both immature DCX+ (green) and more mature (NeuN, blue) neurons, shown at  
148 63x. **E)** Another image of hNSCs (Ku80, green) differentiating into both immature DCX+ (red)  
149 and more mature (NeuN, blue) neurons, shown at 63x. **F)** 63x mag. hNSCs (SC121, red)  
150 differentiate into interneurons Calretinin (green) and some vGlut1 (blue, white arrow) puncta can  
151 be observed in the implantation site. The inset image shows the entire implant at 10x. **G)** 63x mag.  
152 hNSCs (Human nuclear antigen HNA, red) differentiate into a mixed population of cells that co-  
153 stain with GAD65/67 (green) or Beta III-tubulin (blue). **H)** Image shows hNSCs (HNA, green)  
154 differentiating into MSNs, DARPP32+ (red) Ctip2+ (blue) at 60x. **I)** Another 60x image showing  
155 hNSCs differentiating into MSNs using hDARPP32+ (red) and hCtip2+ (blue) only, as well as  
156 some other hNSCs expressing the mature neuronal marker NeuN. **J)** 60x image shows hNSCs  
157 (SC121, blue) expressing the MSN marker Ctip2 (green) and co-localization with the inhibitory  
158 neuronal marker GABA (red). **K)** 4x mag. and **L)** (20x) showing H&E stains. A small nodule of  
159 cells that migrated away from the initial injection track are shown (at arrow, enlarged in L). Review  
160 from pathology included the comments that cytologically, the cells in the nodules are mostly well  
161 differentiated cells, with lots of large, mature-looking neurons.  
162

163 **ESI-017 hNSCs Improve Behavior in zQ175 HD Mice:** We previously established that  
164 engrafted ESI-017 hNSCs significantly improve multiple behavioral outcomes in R6/2 and  
165 homozygous Q140 HD model mice (Reidling et al., 2018). To determine if hNSC implantation  
166 was also efficacious in heterozygous zQ175 mice used in this study we performed established  
167 behavioral assays for these mice. We found strikingly significant improvements in the running  
168 wheel test in mice that were 7.5 months old (5.5 months post implant) in ESI-017 hNSC implanted  
169 heterozygous zQ175 mice compared to vehicle mice, suggesting a reversion to WT levels and  
170 persistence of the effect (**Fig. 2A**). The slope of motor learning was not significantly different  
171 among the 3 groups. In addition, we found significant improvements in distance traveled and  
172 velocity for hNSC-treated male and female mice combined compared to vehicle in the open field



173 in mice that were 8 months of age (6 months post-implant) (**Fig. 2B & C**). All open field behavioral  
174 outcomes are provided in Supplementary Materials (**Suppl. Fig. 1A-C**).

175

176 **Engrafted ESI-017 hNSCs Correlate with Increased BDNF and Decreased Pathogenic**

177 **Accumulation of mHTT Proteins:** Increased levels of BDNF were demonstrated after hNSC

178 implantation in the rapidly progressing R6/2 HD mouse model (Reidling et al., 2018), therefore

179 we evaluated whether this effect could be sustained following long-term engraftment in zQ175

180 mice. Striatal BDNF quantified by Western blot analysis was slightly but not significantly

181 decreased in a subset of male zQ175 mice (n=3/group) compared to WT, but a significant increase

182 in BDNF levels was observed in hNSC-treated zQ175 mice compared to vehicle (**Fig. 2D & E**).

183 Interestingly, we also observed an increase in the phosphorylation of extracellular signal-regulated

184 kinase (ERK) protein suggesting potential activation of cellular signaling cascades (**Fig. 2D & F**).

185 In addition, our previous studies showed that hNSC treatment can reduce high molecular weight

186 (HMW) mHTT species, a pathogenic marker for HD. Consistent with those results we also

187 observed persistent reduction in levels of a HMW mHTT species in hNSC treated zQ175 mice

188 (**Fig. 2G & H**), suggesting prevention of pathology by the transplanted cells.

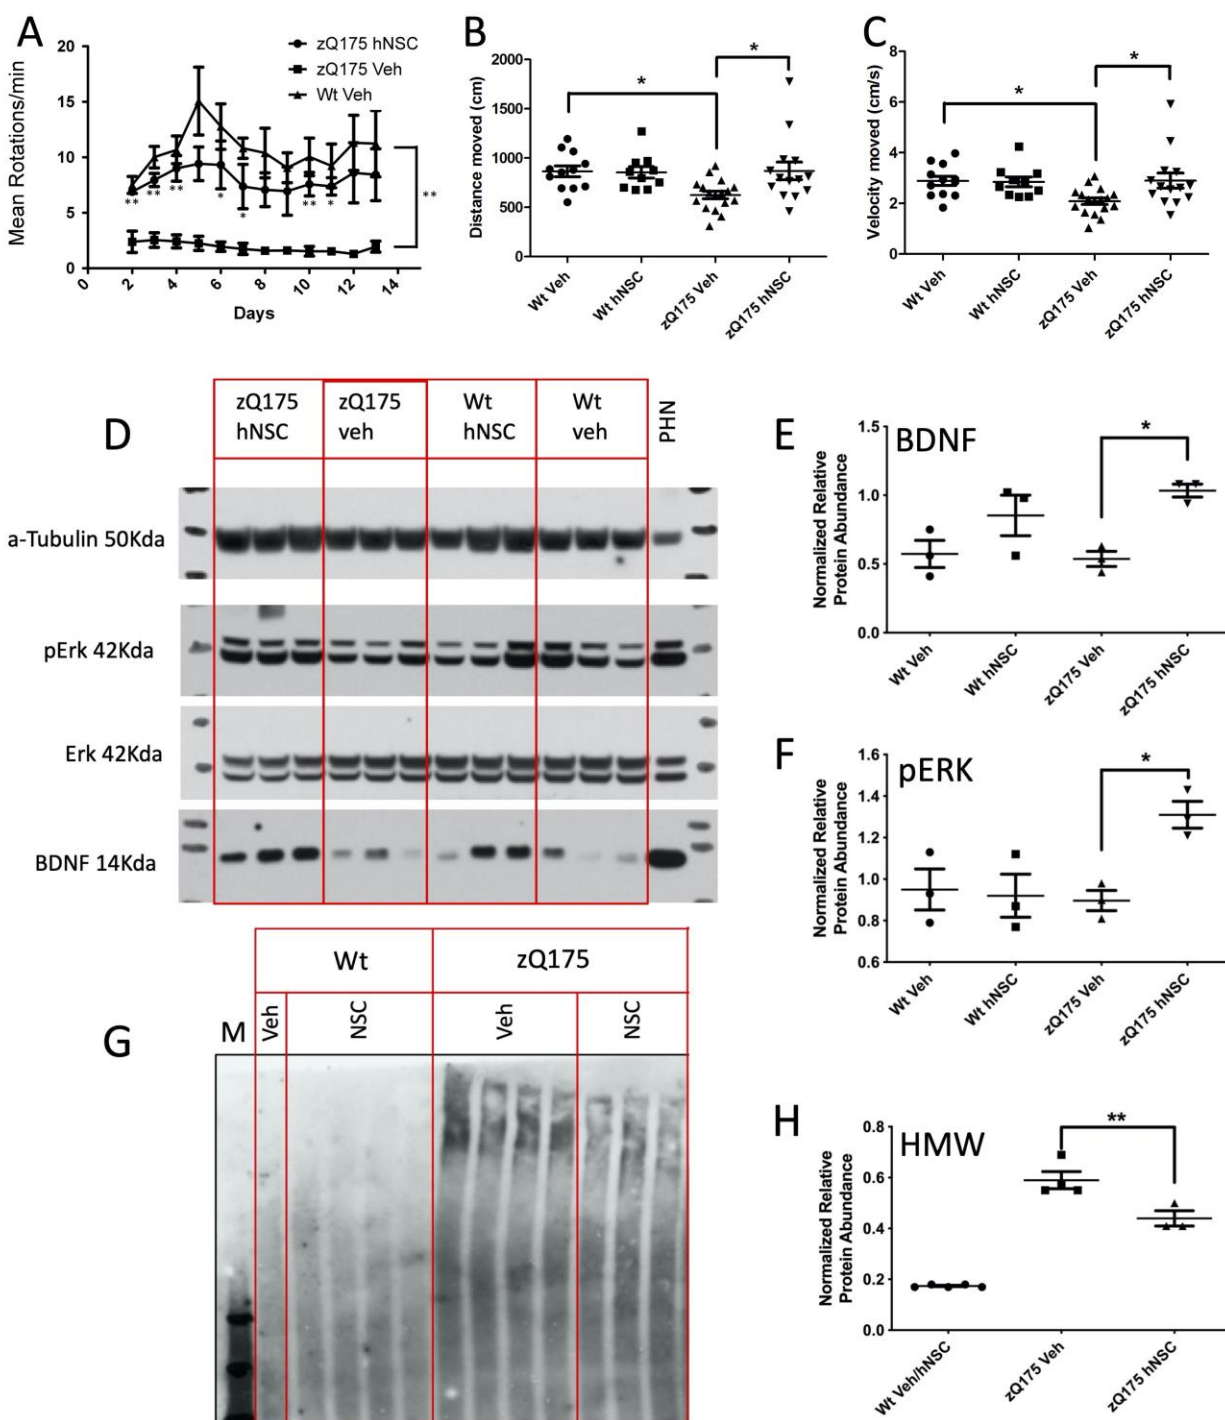

189

190 **Figure 2: ESI-017 hNSCs implanted in zQ175 mice improve behavior, increase BDNF and**  
 191 **p-ERK levels and reduce levels of a HMW mHTT species: A.** Running wheel shows persistent  
 192 improvement 5.5 months post-treatment. Mean running wheel rotations/minute/night over two  
 193 weeks, in WT, zQ175 vehicle (veh) treated or zQ175 hNSC and zQ175 veh treated male mice  
 194 (5/group). Results are expressed as the mean  $\pm$  S.E.M one-way ANOVA Tukey HSD and  
 195 Bonferroni post test p values for zQ175 veh treated to zQ175 hNSC treated Day2=0.003

196 Day3=0.001, Day4=0.002, Day5=0.06, Day6=0.03, Day7=0.03, Day8=0.07, Day9=0.06,  
197 Day10=0.009, Day11=0.01, Day12=0.08, Day13=0.1 summarized as \* p<0.05, \*\* p<0.01, shown  
198 below error bars. WT veh to zQ175 veh Day2=0.001 Day3=0.001, Day4=0.001, Day5=0.002,  
199 Day6=0.002, Day7=0.001, Day8=0.005, Day9=0.01, Day10=0.001, Day11=0.002, Day12=0.02,  
200 Day13=0.03, summarized as \*\*p $\leq$ 0.03 at right. WT veh to zQ175 hNSC was not significantly  
201 different at any time-point. **B.** Total distance traveled in the open field 6 months post implant. Mice  
202 were subjected to the open field and total distance in centimeters of their respective tracks were  
203 combined and statistically analyzed to visualize any differences in ambulation. The zQ175 veh  
204 treated mice traveled less distance than WT veh and zQ175 hNSC treated mice. **C.** Velocity  
205 traveled in the open field 6 months post implant. Mice were subjected to the open field and velocity  
206 traveled in centimeters/sec of their respective tracks were combined and statistically analyzed to  
207 visualize any differences in time of ambulation. The zQ175 veh treated mice traveled slower than  
208 WT veh and zQ175 hNSC treated mice. Groups for open field included: 7 male zQ175 Het hNSC,  
209 7 female Het hNSC, 9 male zQ175 Het veh, 8 female zQ175 Het veh, 5 male WT hNSC, 5 female  
210 WT hNSC, 6 male WT veh, 6 female WT veh. Results are expressed as the mean  $\pm$  S.E.M with  
211 one-way ANOVA Tukey HSD and Bonferroni post test: \* p=0.03 for genotype and p=0.02 for  
212 hNSC treatment in zQ175. **D.** Western blot analysis of whole tissue mouse striatal lysates from  
213 zQ175 and WT mice. zQ175 mice exhibited non-significantly reduced levels of BDNF compared  
214 to WT mice and levels were significantly increased with hNSC treatment. zQ175 mice also showed  
215 significantly increased levels of pERK compared to vehicle controls. Quantitation of the  
216 relative protein expression for BDNF (**E**) and pERK (**F**) is shown. **G.** Western blot analysis of  
217 mouse striatal lysates separated into detergent-soluble and detergent-insoluble fractions. zQ175  
218 mouse striatum is enriched in insoluble accumulated mHTT compared to WT mice. hNSC  
219 implantation in zQ175 mice results in a significant reduction of insoluble HMW accumulated  
220 HTT. Quantitation of the relative protein expression for mHTT is shown in (**H**) and hNSC  
221 implantation results in a significant decrease of insoluble HMW accumulated mHTT. Graph values  
222 represent means  $\pm$  SEM and Western blots were analyzed with ImageJ for quantification of BDNF  
223 (normalized to tubulin), ERK/pERK ratio or aggregate type/section. Data was analyzed by one-  
224 way ANOVA with Tukey HSD and Bonferroni post hoc test (n = 3/group) \*p = 0.03, \*\*p = 0.005.  
225

226 **Electrophysiological and Morphological Characterization of hNSCs:** hNSCs transplanted for  
227 4 weeks in R6/2 mice showed properties of immature electrophysiologically active hNSCs  
228 (Reidling et al., 2018), however, we did not know whether this could be sustained or improved in  
229 long-term implanted mice. To perform electrophysiological studies we used a subset of female  
230 zQ175 and WT mice (10.5 month-old) implanted at UCI and shipped live to UCLA. The hNSC  
231 grafts in zQ175 mice were easily identifiable under IR-DIC microscopy (**Fig. 3A1 & A2**). In  
232 contrast to host tissue, which appeared darker due to myelin from fiber tracks, the graft appeared  
233 more translucent and densely populated by diverse cell types. In agreement with histological

234 findings, most cells (~80%) within the graft sites were small (<15  $\mu\text{m}$  in diameter), round or  
235 bipolar, and had few extended processes. These cells appeared to be visually similar to the  
236 immature neuronal cell types previously recorded in R6/2 mice 4-6 weeks after implantation  
237 (Holley et al., 2018; Reidling et al., 2018). We also observed a number of cells that were larger in  
238 size (15-25  $\mu\text{m}$  in diameter) with abundant and extensive processes that were visually different  
239 from host MSNs. As immature-looking hNSCs were characterized extensively in our previous  
240 publication, in the present study we focused our recordings on these larger, more mature-looking  
241 cells. We found for all hNSC types, membrane properties were similar for cells recorded in either  
242 zQ175 or WT mice and data from recorded hNSCs from both genotypes were pooled (**Table IA,**  
243 **Fig. 3C**).

244 Recorded cells in the grafts appeared to differentiate into two groups, one population of  
245 cells with immature-like electrophysiological properties and one population with more mature-like  
246 properties. In total, 49 hNSCs were recorded (n=18 in WT and 31 in zQ175 mice). The two groups  
247 of hNSCs were separated based on whole-cell patch-clamp recordings in voltage clamp mode  
248 measuring passive membrane properties (cell membrane capacitance, input resistance and decay  
249 time constant), as well as  $\text{Na}^+$  current amplitudes. Cells with low membrane capacitance  
250 (mean $\pm$ s.e., 18.6 $\pm$ 2.7 pF), high input resistance (847.3 $\pm$ 269.9 M $\Omega$ ), fast time constant (0.51 $\pm$ 0.08  
251 ms), and  $\text{Na}^+$  current amplitude <1 nA were immature-looking hNSCs (n=9, 3 in WT and 6 in  
252 zQ175 mice) (**Fig. 3B1 & C**). A number of these cells did not display  $\text{Na}^+$  currents and were  
253 probably glial cells, e.g., astrocytes (n=2 in WT and 5 in zQ175 mice). In contrast, cells with high  
254 membrane capacitance (128.5 $\pm$ 10.0 pF), medium-high input resistance (625.1 $\pm$ 64.6 M $\Omega$ ), slower  
255 time constant (2.2 $\pm$ 0.2 ms), and  $\text{Na}^+$  current amplitude >1 nA were mature-looking hNSCs (n=40,  
256 15 in WT and 25 in zQ175 mice, **Fig. 3B2 & C**).

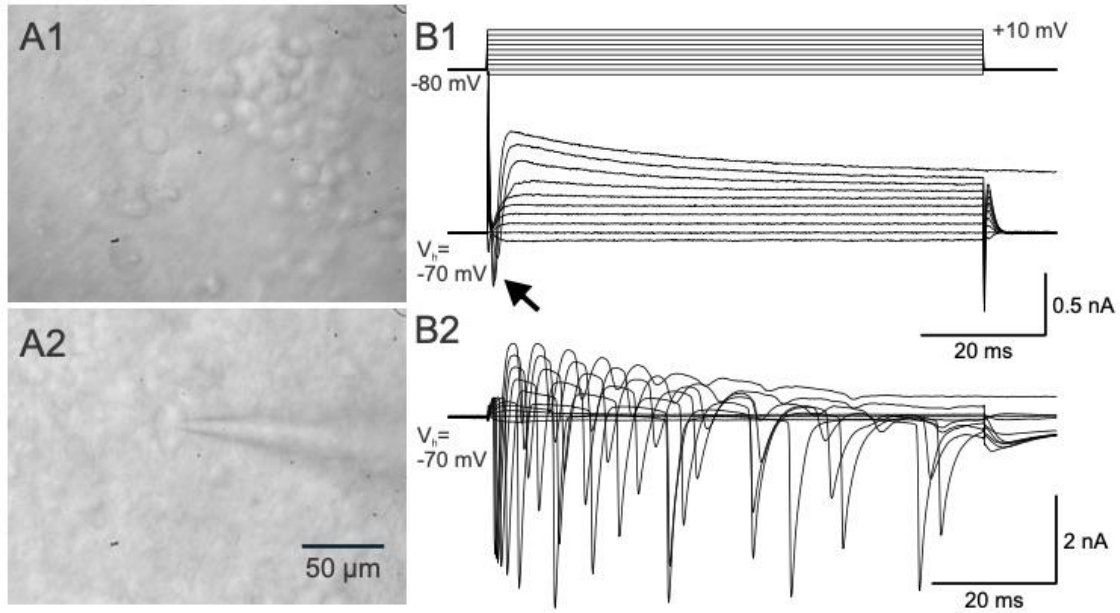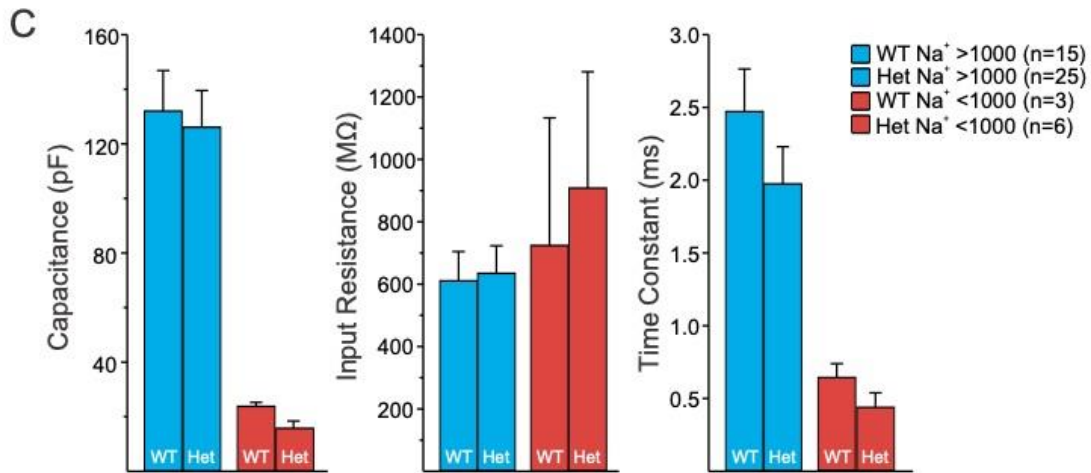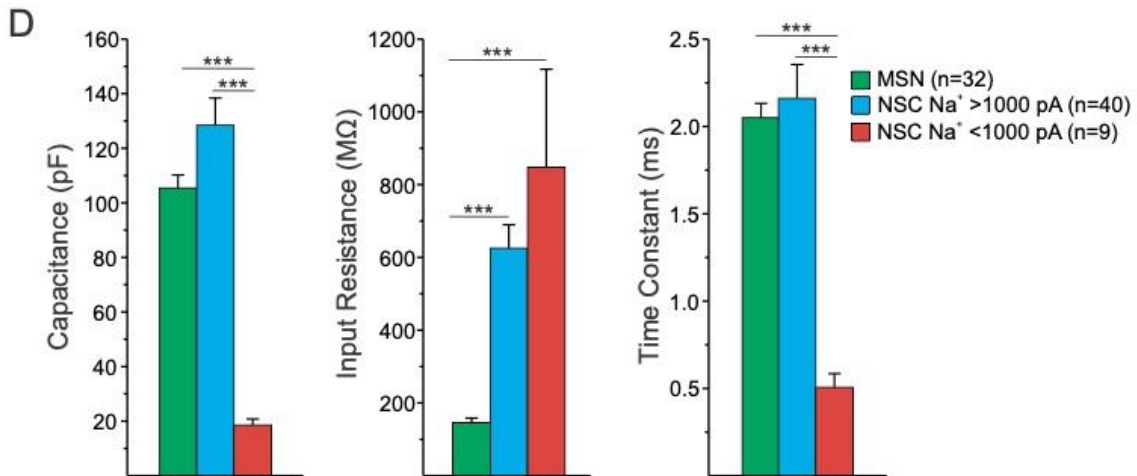



258 **Figure 3: Two main types of hNSCs could be distinguished based on soma size, passive and**  
259 **active membrane properties. (A1).** IR-DIC image from transplanted hNSCs in a zQ175 mouse  
260 revealed that most cells had small, round somata. **(A2).** A small percentage of hNSCs had larger  
261 somata and some dendritic branches. A patch pipette attached to the cell can be seen. Example cell  
262 is from a zQ175 mouse. **(B1).** Recordings performed on hNSCs in zQ175 mice show that  
263 depolarizing step voltage commands from a holding voltage ( $V_h$ ) of -70 mV induced only incipient  
264  $\text{Na}^+$  currents (<1000 pA) and large outward  $\text{K}^+$  currents. These cells were deemed immature.  
265 Example trace is from a zQ175 mouse. Voltage clamp protocol is shown above the current traces.  
266 **(B2).** Large cells displayed repetitive large  $\text{Na}^+$  spikes (>1000 pA) and were deemed mature.  
267 Example trace is from a WT mouse receiving an implant of hNSCs. **C.** Bar graphs show  
268 mean $\pm$ S.E.M of cell membrane properties of two types of implanted hNSCs, those with immature  
269 (red) and those with mature (blue) membrane properties, using  $\text{Na}^+$  current amplitude as cut-off.  
270 Capacitance, input resistance and time constants are shown for recorded hNSCs. **D.** Bar graphs  
271 show mean $\pm$ S.E.M of cell membrane properties of host MSNs (WT and zQ175 pooled together)  
272 compared to implanted hNSCs. Capacitance, input resistance and time constants are shown for  
273 recorded host MSNs and mature and immature hNSCs. Statistical significance was measured using  
274 one-way ANOVA tests followed by Bonferroni *post hoc* tests for pairwise comparisons and \*\*\*  
275 represents  $p < 0.001$ . In (D.) Capacitance:  $p = 2.0007e-05$  for MSN versus NSC  $\text{Na}^+ < 1000$  pA and  
276  $p = 6.1282e-08$  for NSC  $\text{Na}^+ > 1000$  pA versus NSC  $\text{Na}^+ < 1000$  pA. Input Resistance:  $p = 5.3000e-$   
277  $06$  for MSN versus NSC  $\text{Na}^+ > 1000$  pA and  $p = 2.6645e-05$  for MSN versus NSC  $\text{Na}^+ < 1000$  pA.  
278 Time Constant:  $p = 8.9566e-05$  for MSN versus NSC  $\text{Na}^+ < 1000$  pA and  $p = 1.7886e-05$  for NSC  
279  $\text{Na}^+ > 1000$  pA versus NSC  $\text{Na}^+ < 1000$  pA.  
280

281 To further characterize maturation and differentiation of hNSCs, we compared their basic  
282 membrane properties with those of MSNs recorded from the host (**Fig. 3D**). While subtle  
283 differences in membrane properties have been reported in MSNs giving rise to the direct and  
284 indirect pathways (Cepeda et al., 2008; Gertler et al., 2008), in the present study we did not  
285 differentiate these two classifications of MSNs. Cells with  $\text{Na}^+$  currents >1 nA had large membrane  
286 capacitance, similar to or even larger than that of host MSNs. In contrast, cells with low amplitude  
287  $\text{Na}^+$  currents had very low membrane capacitance, similar to recordings from immature neurons.  
288 Both types of hNSCs had relatively high membrane input resistance compared with MSNs. In  
289 addition, differences in decay time constants were similar to those observed for cell capacitance.  
290 About 50% of recorded hNSCs lacked inward  $\text{Ca}^{2+}$  currents, usually visible with  $\text{Cs}^+$ -based  
291 internal solution after depolarizing voltage commands, suggesting that these cells were not

292 projection MSNs. However, the remaining recorded hNSCs ( $n=10$  in WT mice and  $n=14$  in zQ175)  
293 displayed inward  $\text{Ca}^{2+}$  currents. Some of these cells displayed  $\text{Ca}^{2+}$  currents larger in amplitude  
294 and similar to those observed in host MSNs ( $n=5$  in WT mice and  $n=6$  in zQ175) (**Fig. 4**).

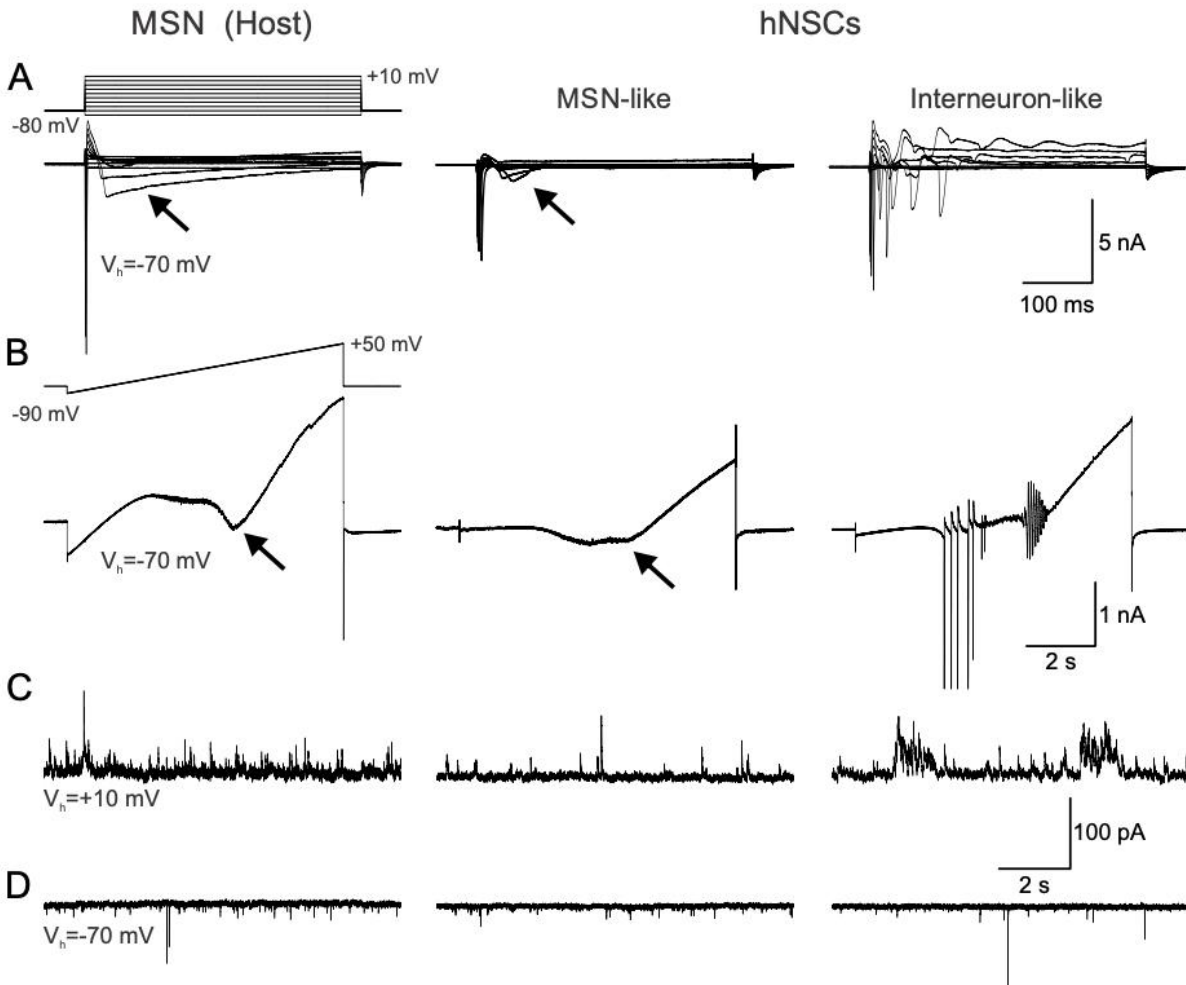

295

296 **Figure 4: Examples of host MSN and mature hNSCs from a zQ175 mouse.** Some hNSCs  
297 displayed mature neuronal properties that were similar to (MSN-like) and different (interneuron-  
298 like) from host MSNs. **A.** Recordings of intrinsic currents in response to step voltage commands  
299 (10 mV steps from -80 to +10 mV) in a host MSN (left panel) and in a MSN-like (center panel)  
300 and an interneuron-like (right panel) hNSC. Depolarizing voltage commands induced large  $\text{Na}^+$   
301 currents followed by inactivating  $\text{Ca}^{2+}$  currents (arrows) of variable amplitudes. In the interneuron-  
302 like cell, repetitive spikes were observed but no prominent  $\text{Ca}^{2+}$  currents. **B.** Recordings of currents  
303 in response to a ramp voltage command (8 sec, from -90 to +50 mV). Some hNSCs recorded  
304 (center panel) had properties similar to host MSNs, both displaying  $\text{Ca}^{2+}$  currents (black arrows)  
305 after membrane depolarization. Other large hNSCs recorded lacked  $\text{Ca}^{2+}$  currents but displayed  
306 repetitive  $\text{Na}^+$  spikes (right panel) and were probably interneurons. **C.** Spontaneous synaptic  
307 currents recorded at +10 mV in a host MSN and in MSN-like and interneuron-like hNSCs. These

308 currents are mostly GABAergic. **D.** Spontaneous synaptic currents recorded at -70 mV in a host  
309 MSN and in a MSN-like and an interneuron-like hNSC. These currents are most likely  
310 glutamatergic. Traces in each column are from the same cell. Calibrations on the right apply to all  
311 traces in each row.  
312

313 The intrinsic membrane properties of these hNSCs were not significantly different regardless of  
314 the mouse genotype (**Table IB & C**). These cells also displayed frequent spontaneous synaptic  
315 activity and could represent projection neurons with the potential to connect with other cells inside  
316 and outside the graft. Biocytin labeling revealed these cells had abundant dendritic processes and  
317 sparse spines (**Fig. 5**).

318 **Table I**

319 **A: Numbers and Percentages of hNSCs Recorded Electrophysiologically**

| 320                     | $I_{Na^+} > 1 \text{ nA}$ | $I_{Na^+} < 1 \text{ nA}$ | $I_{Ca^{2+}}$ | MSN-like |
|-------------------------|---------------------------|---------------------------|---------------|----------|
| 321 <b>WT</b> (n=18)    | 15 (83%)                  | 3 (17%)                   | 10 (56%)      | 5 (33%)  |
| 322 <b>zQ175</b> (n=31) | 25 (81%)                  | 6 (19%)                   | 14 (45%)      | 6 (24%)  |

323

324 **B: Cell Membrane Properties of hNSCs Displaying  $I_{Ca^{2+}}$  Implanted in WT or zQ175 Mice**

| 325                     | Capacitance (pF) | Input Resistance (M $\Omega$ ) | Time Constant (ms) |
|-------------------------|------------------|--------------------------------|--------------------|
| 326 <b>WT</b> (n=10)    | 103.2 $\pm$ 12   | 780.0 $\pm$ 104                | 2.1 $\pm$ 0.3      |
| 327 <b>zQ175</b> (n=14) | 109.2 $\pm$ 14   | 778.2 $\pm$ 137                | 1.8 $\pm$ 0.2      |

328

329 **C: Cell Membrane Properties of Recorded hNSCs Displaying Large, MSN-like  $I_{Ca^{2+}}$**   
330 **Implanted in WT or zQ175 Mice**

| 331                    | Capacitance (pF) | Input Resistance (M $\Omega$ ) | Time Constant (ms) |
|------------------------|------------------|--------------------------------|--------------------|
| 332                    |                  |                                |                    |
| 333 <b>WT</b> (n=5)    | 89.2 $\pm$ 9     | 945.2 $\pm$ 145                | 1.6 $\pm$ 0.3      |
| 334 <b>zQ175</b> (n=6) | 107.6 $\pm$ 12   | 727.8 $\pm$ 156                | 1.6 $\pm$ 0.3      |

335

336

**D: Cell Membrane Properties of Host MSNs from WT Mice**

337

338

339

340

341

|                      | Capacitance (pF) | Input Resistance (M $\Omega$ ) | Time Constant (ms) |
|----------------------|------------------|--------------------------------|--------------------|
| <b>WT-Veh</b> (n=9)  | 110.2 $\pm$ 7    | 78.0 $\pm$ 8                   | 2.2 $\pm$ 0.1      |
| <b>WT-hNSC</b> (n=7) | 113.4 $\pm$ 13   | 109.2 $\pm$ 20                 | 2.1 $\pm$ 0.2      |

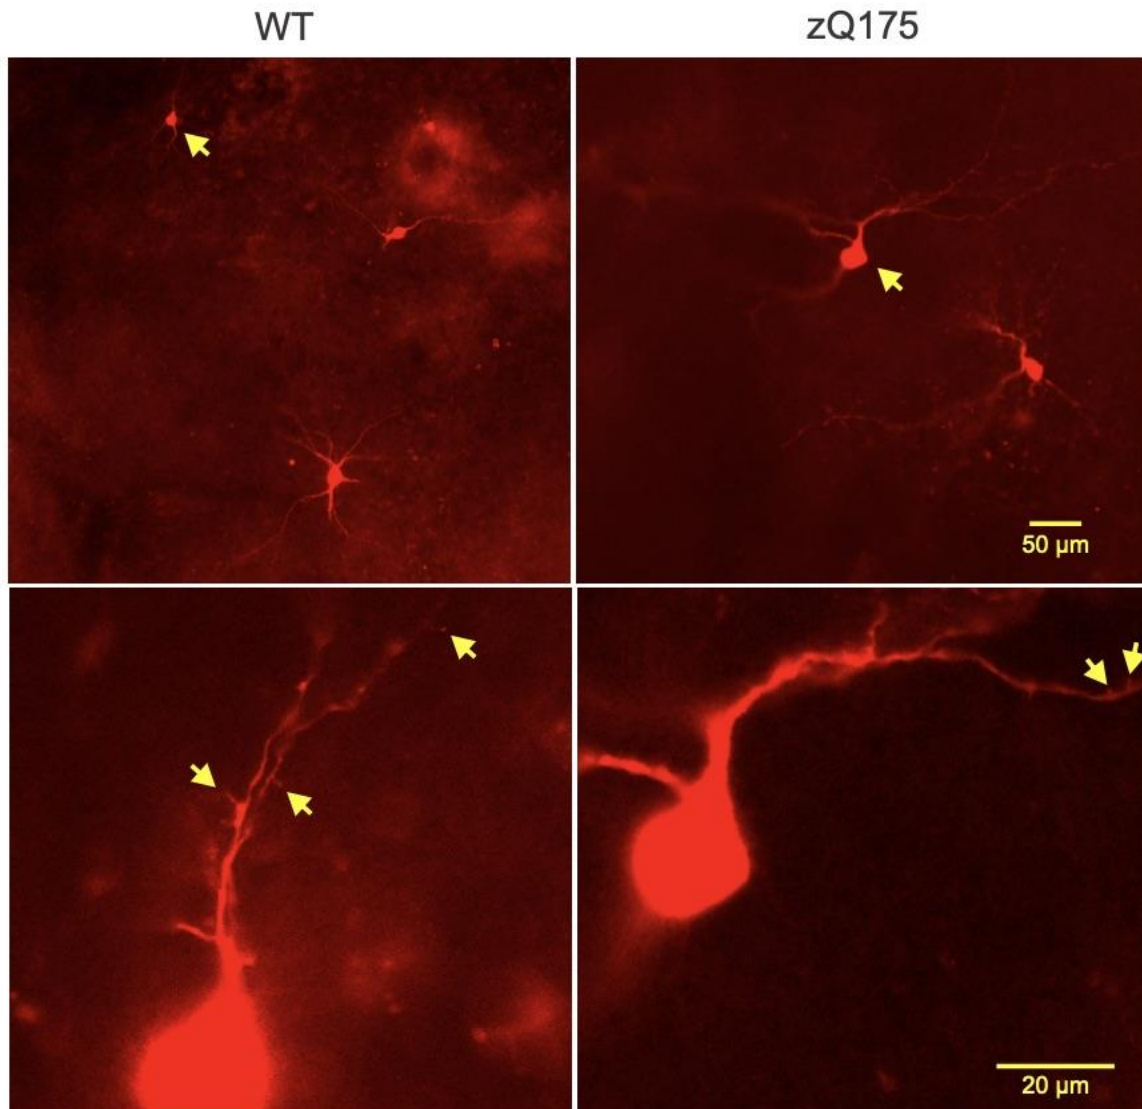

342

343

344

345

346

347

**Figure 5: Biocytin-filled hNSCs recorded in WT and zQ175 mice in host striatum.** Upper panels show low-magnification images of several hNSCs. Arrows indicate two cells that displayed MSN-like electrophysiological properties. Lower panels show processes from the same cells at higher magnification. Arrows indicate possible dendritic spines.

348           The remainder of hNSCs did not display  $\text{Ca}^{2+}$  currents. Instead, they displayed large inward  
349  $\text{Na}^+$  and outward  $\text{K}^+$  currents, and could fire repetitive action potentials. We were able to recover  
350 ~50% of biocytin-filled hNSCs (9/18 or 50% and 15/31 or 48% recorded in WT and zQ175 mice,  
351 respectively). Importantly, over 80% of those recovered clearly co-immunostained with the SC121  
352 and Ku80 markers (8/9 or 89% and 12/15 or 80% in WT and zQ175 mice, respectively), thus  
353 confirming their human origin. Post-recording immunostaining of biocytin-filled large hNSCs  
354 with SC121 and Ku80 (with streptavidin-Alexa 594 for cell visualization) in fixed slices revealed  
355 hNSCs with relatively large somata (compared to host MSNs) and extensively branched processes.  
356 Other visible hNSCs were smaller in size and had either many or a small number of processes. The  
357 large hNSCs had cell diameters of up to ~25  $\mu\text{m}$  and were positive for both SC121 and Ku80  
358 immunostaining (**Fig. 6**). Another important difference was that, compared with host MSNs or  
359 MSN-like hNSCs, many large hNSCs fired spontaneously. In cell-attached recording mode, cells  
360 fired rhythmically and also received rhythmic GABAergic synaptic inputs. We tentatively  
361 concluded these inputs were GABAergic because the GABA reversal potential was around -60  
362 mV (**Suppl. Fig. 2**). Due to this rhythmic input, one possibility is that the source of this GABA  
363 input is from other mature hNSCs, as hNSCs remained in close proximity. In addition, host  
364 GABAergic interneurons, such as the somatostatin-expressing or neuropeptide Y (NPY)-  
365 expressing interneurons that fire spontaneously, may contribute to these rhythmic inhibitory events  
366 recorded in hNSCs. Another type of recorded hNSC (n=3) resembled low-threshold spiking (LTS)  
367 striatal interneurons (**Suppl. Fig. 3A**). In current clamp mode these cells displayed prominent  
368 delayed rectification at hyperpolarized membrane potentials (**Suppl. Fig. 3B**). When depolarized  
369 they discharged in bursts of action potentials, seemingly riding on a low-threshold  $\text{Ca}^{2+}$  spike  
370 followed by a membrane hyperpolarization, which produced spontaneous oscillations and bursts



371 of action potentials (**Suppl. Fig. 3C**). The last type of hNSC (n=2) resembled cholinergic (ChAT-  
372 expressing) interneurons, also known as striatal tonically active neurons (TAN). They displayed  
373 rhythmic firing (2-3 Hz) and prominent delayed inward rectification. Electrophysiological  
374 identification of these interneurons was supported by IHC detection of appropriate markers  
375 (**Suppl. Fig. 4 and 5**).

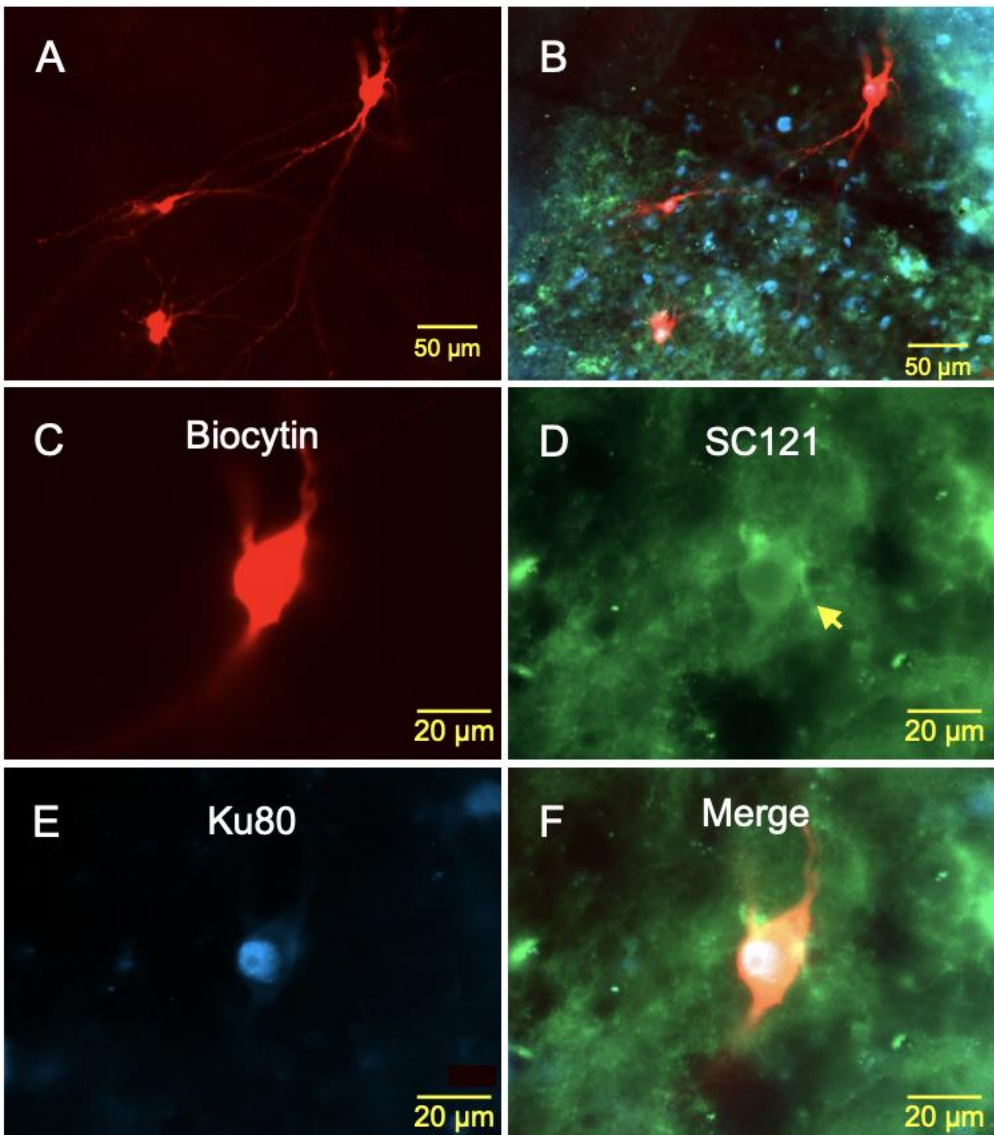

376

377 **Figure 6: Images of large hNSCs from a zQ175 mouse, which displayed interneuron-like**  
378 **electrophysiological properties.** **A.** Four medium to large hNSCs were recorded within the graft.  
379 **B.** The same image showing staining for the human markers SC121 (cytoplasmic, green) and Ku80  
380 (nuclear, blue). **C.** Fluorescent image of one of the large biocytin-filled hNSCs. Immunostaining

381 of the same hNSC with human stem cell markers SC121 (arrow in **D**) and Ku80 (**E**). **F**. Merged  
382 image showing biocytin and the two human stem cell markers. The electrophysiology of this  
383 interneuron-like hNSC is shown in Fig. 4 (right panels).

384

385 **Synaptic Properties of hNSCs Compared with Host MSNs:** Glutamatergic inputs onto hNSCs

386 were examined by holding the membrane at -70 mV. GABAergic inputs were examined by holding

387 the membrane at +10 mV. Immature hNSCs displayed very few synaptic inputs whereas mature

388 hNSCs had a wide range of synaptic inputs, some with frequencies as high as those recorded from

389 MSNs [ $2.1 \pm 0.2$  Hz (range 0.2-6.9 Hz) for MSNs versus  $1.5 \pm 0.2$  Hz (range 0.0-8.7 Hz) for hNSCs].

390 Based on the frequency of spontaneous synaptic activity, cells displaying  $\text{Na}^+$  currents could be

391 divided into those with high IPSC and high EPSC frequencies, high IPSC and low EPSC

392 frequencies, and low IPSC and high EPSC frequencies. As expected, large hNSCs displayed higher

393 frequencies than those of immature-looking hNSCs (**Fig. 7A-C**). Some hNSCs (n=2) also were

394 tested for their ability to respond to electrical stimulation in the vicinity of the graft. Both cells

395 responded to the electrical stimulation displaying both glutamatergic and GABAergic responses,

396 as demonstrated by specific blockade with appropriate receptor antagonists (**Fig. 7D**). Thus, these

397 studies provided evidence that hNSCs establish synaptic contacts with the host and probably

398 among hNSCs as well.

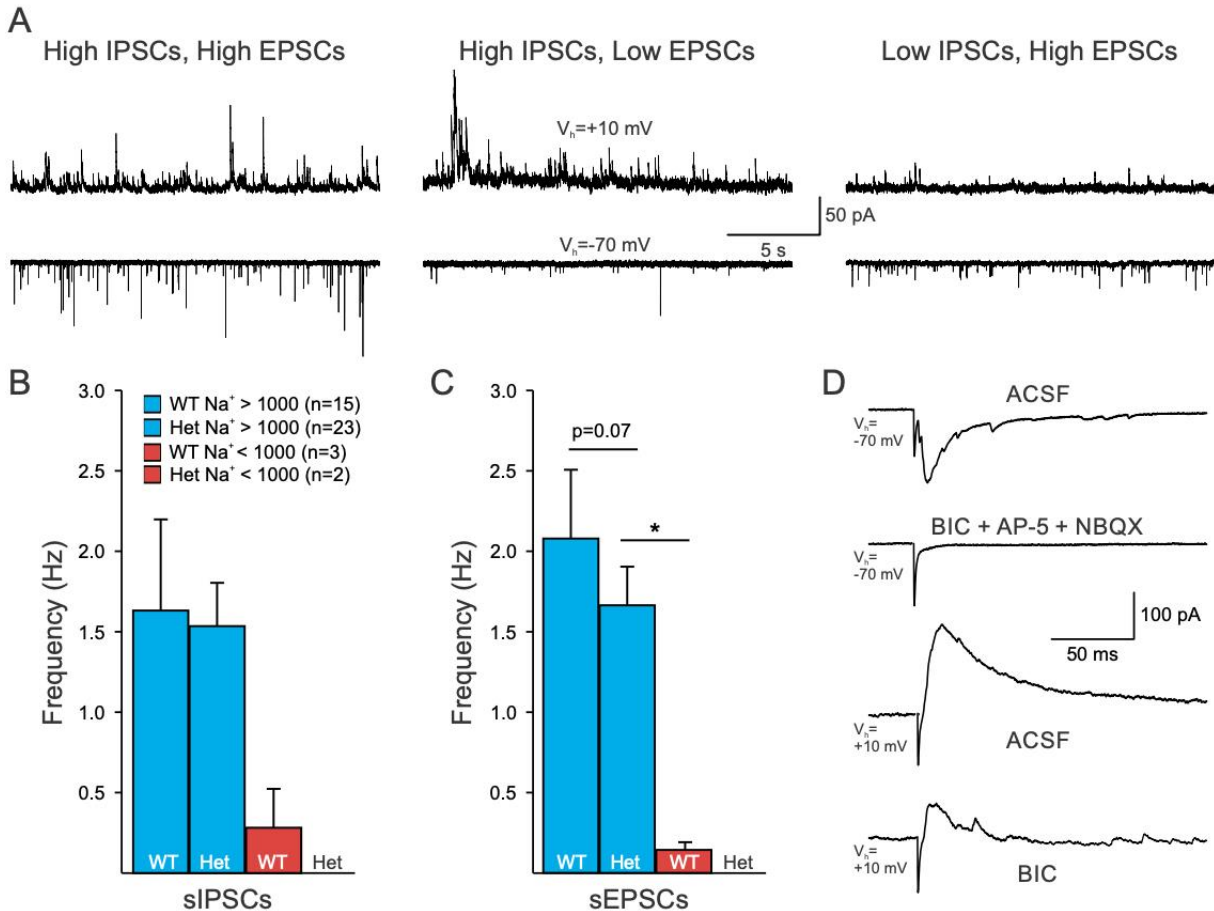

399

400 **Figure 7: hNSCs in WT and Q175 mice display multiple synaptic inputs.** **A.** Sample traces of  
 401 sIPSCs and sEPSCs recorded from hNSCs in a zQ175 mouse in ACSF. **B** and **C.** Summary of the  
 402 sIPSC and sEPSC frequencies from hNSCs categorized by the size of their  $Na^+$  currents. Statistical  
 403 significance was measured between groups using Kruskal-Wallis one-way ANOVA on ranks  
 404 followed by Holm-Sidak pairwise comparisons, where \*  $p=0.024$  for Het  $Na^+ > 1000$  pA versus  
 405 WT  $Na^+ < 1000$  pA. **D.** Responses evoked by electrical stimulation (0.1-0.5 mA, 1 ms duration) of  
 406 host striatal neurons (about 200  $\mu$ m lateral to the graft) in a hNSC from a zQ175 mouse.  
 407 Glutamatergic ( $V_h = -70$  mV) and GABAergic ( $V_h = +10$  mV) responses were reliably evoked by  
 408 electrical stimulation. Responses were blocked by glutamate and GABA<sub>A</sub> receptor antagonists  
 409 respectively.

410

411 **Ultrastructural Evidence that hNSCs Establish Synaptic Contacts Within and Outside the**

412 **Graft:** To examine the morphology of implanted hNSCs and determine whether synaptic contacts

413 are present between the host and transplanted hNSCs, thus further supporting the

414 electrophysiology results, we performed electron microscopy (EM). EM studies provided

415 additional anatomical evidence that hNSCs in the graft received innervation from host neurons. A  
416 subset of the mice implanted at UCI (3 females per group, zQ175 hNSC implanted) were sent live  
417 to the Portland VA Medical Center where the mice were perfused with fixative, the brains were  
418 collected and fixed for EM tissue processing. Results indicate that mouse host cell nerve termini  
419 make both symmetrical and asymmetrical synaptic contacts with implanted ESI-017 hNSCs. As a  
420 proof-of-principle, in a subset of samples we performed double-immunostaining for vGlut1 (which  
421 labels cortical glutamate terminals) and SC121. There were mouse host cell nerve termini that  
422 were positively labeled with vGlut1 making asymmetrical synaptic contacts with ESI-017 hNSCs  
423 (**Fig. 8A**), suggesting that mouse (host) cortical neurons contribute to these connections. However,  
424 it is also possible that the other major host nerve terminal input to the ESI-017 hNSC implanted  
425 neurons, where an asymmetrical synaptic contact is observed (**Fig. 8B, C**), may be from the  
426 thalamus.

427         Within the implant, of the host (non-labeled) terminals contacting SC121+ dendrites/spines  
428 in the implant site, 60% of the asymmetrical contacts were on dendrites and 40% on spines (total  
429 of 35 observations), suggesting contacts with MSN-like hNSCs. Of the host contacting SC121+  
430 labeled dendrites, if the synaptic contact was symmetrical, 100% of those contacts were on the  
431 dendrite (22 observations). Of all the host (non-labeled) contacts onto SC121+ labeled cells in the  
432 implant area, 62.1% were asymmetrical while 37.9% of the contacts were symmetrical (total of 58  
433 observations).

434         Within the implant, the percentage of SC121+ nerve terminals contacting SC121+  
435 dendrites was determined. We found that of those total synaptic contacts, 71.3% were making an  
436 asymmetrical synaptic contact, with 27.8% making a symmetrical contact (total of 115  
437 observations). About 1% of the contacts could not be determined as to whether they were

438 symmetrical or asymmetrical. Of those 71.3% of the contacts that were asymmetrical, 36.5% of  
439 those were on dendrites (**Fig. 8D**) while 34.7% were on spines (**Fig. 8E**). Of the 27.8% of the  
440 contacts that were symmetrical, 21.7% were on dendrites (**Fig. 8F**) and 6.1% were on spines.

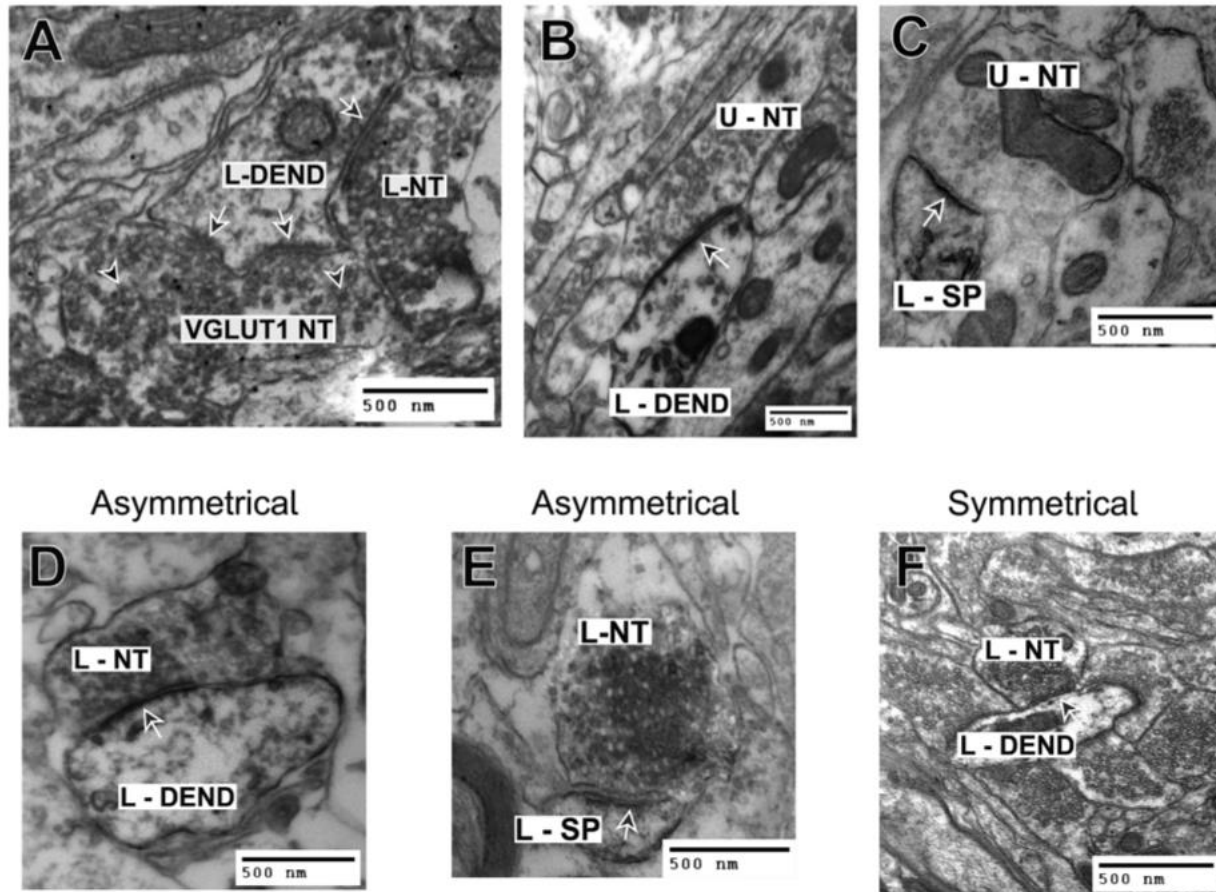

441  
442 **Figure 8: EM studies revealed that the host tissue makes synaptic contacts with ESI-017**  
443 **hNSCs in zQ175 mice within the implantation site: A.** hNSC/DAB labeled nerve terminal (L-  
444 L-NT) making a symmetrical synaptic contact (single black arrow with white outline) with an  
445 hNSC/DAB labeled dendrite (L-DEND). Vglut1 labeled nerve terminal (VGLut1 NT) making an  
446 asymmetrical synaptic contact with the head of a stubby spine that contains a perforated  
447 postsynaptic density (two black arrows with white outline pointing to synaptic contact). The  
448 VGLut1 NT (black arrowheads with white outlining-VIP labeling), is distinguished from the  
449 adjacent nerve terminal (which is DAB labeled). The primary origin of VGLUT-1 containing  
450 neurons is the cortex. **B.** An unlabeled nerve terminal (U-NT) making an asymmetrical synaptic  
451 contact (arrow) with an underlying hNSC positive labeled dendrite (L-DEND) (note the darkened  
452 DAB reaction product within the dendrite). The unlabeled nerve terminal might originate from  
453 either the host striatum, thalamus or cortex (see panel A), while the labeled dendrite originates  
454 from the implanted stem cells. **C.** An unlabeled nerve terminal (U-NT) is making an asymmetrical  
455 synaptic contact (arrow) with an underlying hNSC positive/labeled dendritic spine (L-SP) (note  
456 the darkened DAB reaction product within the spine). As in panel B, the unlabeled nerve terminal



457 might originate from either the host striatum, thalamus or cortex (see panel A), while the labeled  
458 dendritic spine originates from the implanted stem cells. **D.** A labeled nerve terminal (L-NT) is  
459 making an asymmetrical synaptic contact (arrow) with an underlying hNSC positive/labeled  
460 dendrite (L-DEN) (note the darkened DAB reaction product within the nerve terminal and  
461 dendrite). The labeled nerve terminal and dendrite originate from the implanted stem cells. **E.** A  
462 labeled nerve terminal (L-NT) is making an asymmetrical synaptic contact (arrow) with an  
463 underlying hNSC positive/labeled dendritic spine (L-SP) (note the darkened DAB reaction product  
464 within the nerve terminal and spine). The labeled nerve terminal and spine originate from the  
465 implanted stem cells. **F.** A labeled nerve terminal (L-NT) is making a symmetrical synaptic contact  
466 (arrow) with an underlying hNSC positive/labeled dendrite (L-DEN) (note the darkened DAB  
467 reaction product within the nerve terminal and dendrite). The labeled nerve terminal and dendrite  
468 originate from the implanted stem cells.  
469

470         Investigating synaptic contacts outside the implant area (located ~0.25 mm lateral of the  
471 implant site), of the percentage of SC121+ labeled nerve terminals contacting SC121 negatively  
472 labeled postsynaptic dendrites (i.e., from the host), 90.6% were making an asymmetrical synaptic  
473 contact while 9.4% were making a symmetrical contact (total of 32 observations). Of the 90.6%  
474 making an asymmetrical synaptic contact, 79.3% were contacting spines while 20.7% were  
475 contacting dendrites. There were also nerve terminals from the host striatum (i.e., SC121 negative)  
476 contacting SC121+ dendrites. Of those contacts, 52.6% were asymmetrical and 47.4% were  
477 making a symmetrical contact (total of 19 observations) (**Suppl. Fig. 6A-D**).

478

479 **hNSCs Improve Some Altered Intrinsic and Synaptic Membrane Properties of MSNs in Host**  
480 **zQ175 Mice:** Given that we have previously shown that excitatory and inhibitory inputs to striatal  
481 MSNs and cortical pyramidal neurons in the zQ175 mouse model are altered (Indersmitten et al.,  
482 2015), we obtained whole-cell voltage clamp recordings to measure membrane and synaptic  
483 properties of neighboring host MSNs to determine whether transplanted hNSCs conferred  
484 modulatory outcomes (**Fig. 9A-D**). Data from WT mice implanted with hNSCs and injected with  
485 vehicle only were pooled as there were no consistent differences in measures from MSNs between

486 the two groups (**Table ID**). We observed an improvement in the cell membrane properties of  
487 zQ175 MSNs from hNSC-implanted mice compared to zQ175 MSNs from mice receiving the  
488 vehicle only (**Fig. 9A**). Previously, we showed MSNs from symptomatic zQ175 mice have higher  
489 membrane input resistances than MSNs from WT mice (Indersmitten et al., 2015). Compared with  
490 WT MSNs (hNSC-implanted and vehicle-injected, combined), zQ175 MSNs from vehicle-  
491 injected mice had significantly higher input resistances (WT  $91.6 \pm 10.1$  versus Q175-Veh  
492  $170.2 \pm 19.7$  M $\Omega$ ,  $p < 0.001$ ; Kruskal-Wallis ANOVA of ranks, followed by Holm-Sidak pairwise  
493 comparisons). Although input resistances were slightly higher in zQ175-hNSC MSNs ( $120.1 \pm 13.1$   
494 M $\Omega$ ) compared to WT MSNs, this difference was not statistically significant demonstrating  
495 improvement in this electrophysiological property. Input resistances were significantly lower in  
496 MSNs from hNSC-implanted zQ175 mice compared to MSNs from vehicle-injected mice  
497 ( $p = 0.04$ ). There were no significant differences in cell membrane capacitances or membrane time  
498 constants across all three groups (**Fig 9A**).

499 In terms of hNSCs effects on synaptic activity, as reported previously, in zQ175 MSNs  
500 (Indersmitten et al., 2015) the frequency of sIPSCs recorded at a holding potential of +10 mV was  
501 increased compared to WT MSNs (**Fig. 9C**). The increase was statistically significant in MSNs  
502 from Q175 mice injected with vehicle (WT  $1.3 \pm 0.2$  versus Q175-Veh  $2.2 \pm 0.3$  Hz,  $p = 0.047$ ;  
503 Kruskal-Wallis ANOVA of ranks, followed by Holm-Sidak pairwise comparisons) and although  
504 the sIPSC frequency was slightly higher in MSNs from hNSC-implanted zQ175 mice ( $2.0 \pm 0.3$   
505 Hz) compared to WT MSNs, it was not statistically significant ( $p = 0.114$ ) (**Fig. 9C**) demonstrating  
506 that the transplant reduced the increase in sIPSCs in MSNs from the zQ175 mice compared to WT  
507 mice. From the same cells, we recorded sEPSCs at a holding potential of -70 mV and in the  
508 presence of a GABA<sub>A</sub> receptor antagonist (BIC, 10  $\mu$ M). We observed a trend for decreased sEPSC

509 frequency in MSNs from zQ175-Veh mice ( $1.8 \pm 0.3$  Hz) compared to WT MSNs ( $2.8 \pm 0.5$  Hz).  
510 Similarly, there was a trend for an increase in the frequency of sEPSCs in MSNs from the hNSC  
511 transplanted zQ175 mice ( $2.4 \pm 0.5$  Hz).

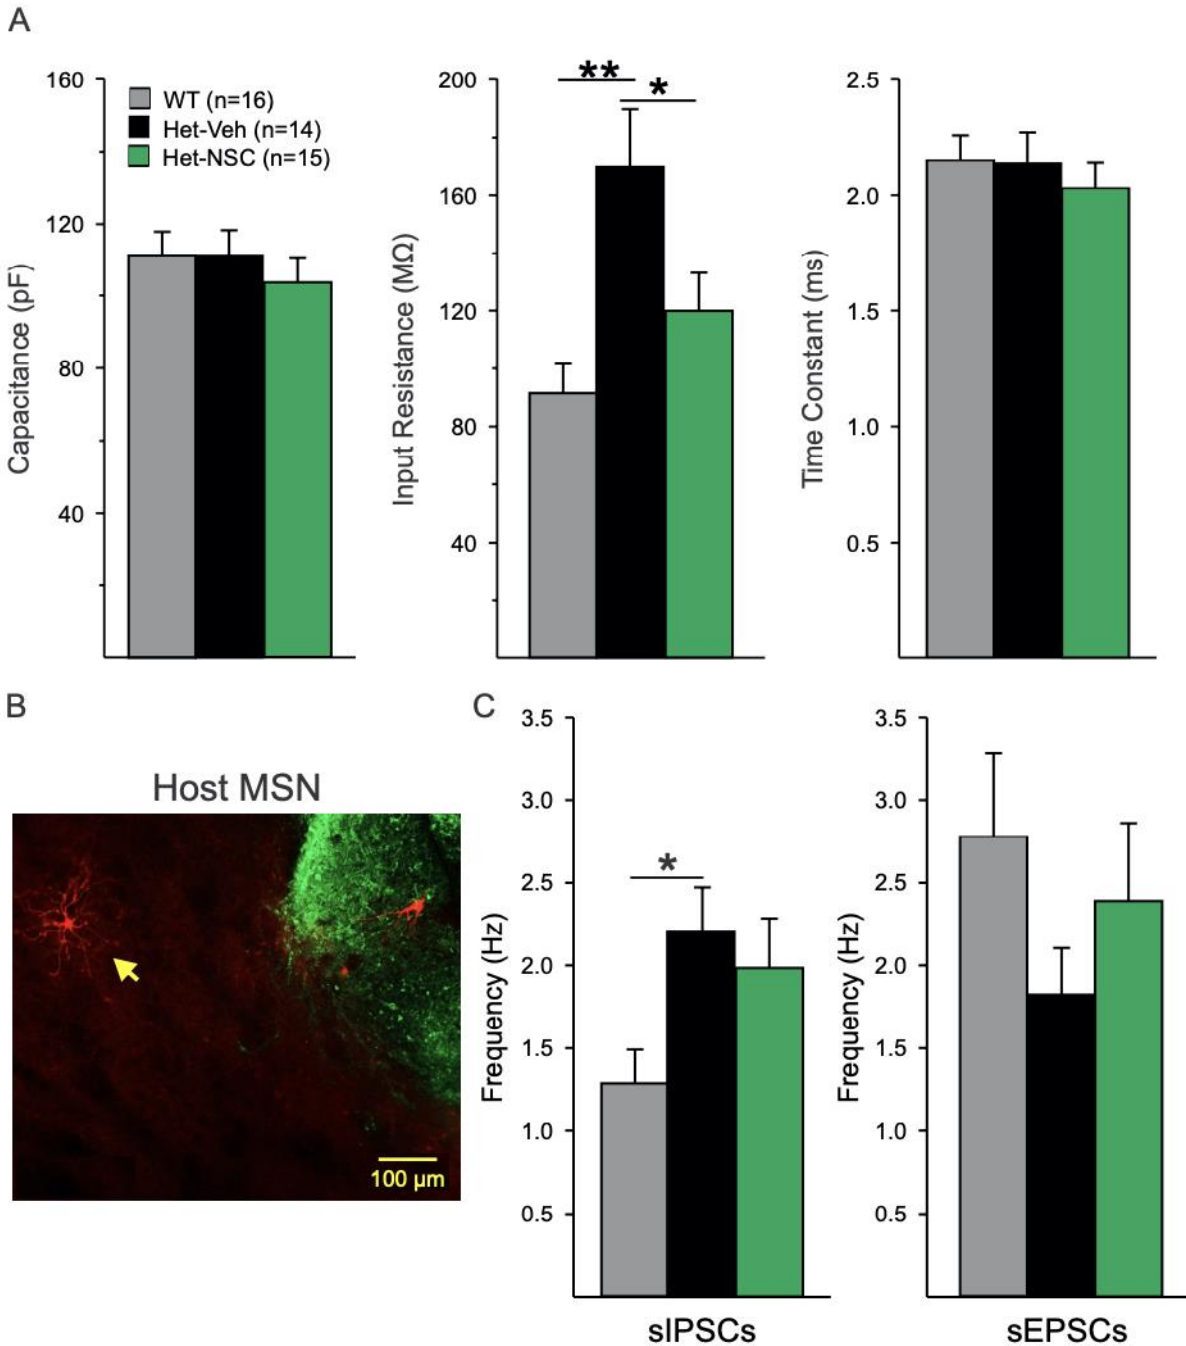

512

513 **Figure 9: Rescue of some electrophysiological alterations.** **A.** Cell membrane properties were  
514 recorded at a holding potential of -70 mV. **B.** Fluorescent image of a recorded and biocytin-filled

515 MSN [yellow arrow pointing to filled neuron (red)] near SC121 immunostained cells and processes  
516 (green). **C.** Effects on inhibitory and excitatory synaptic activity. Statistical significance was  
517 measured between groups using Kruskal-Wallis one-way ANOVA on ranks followed by Holm-  
518 Sidak pairwise comparisons, In **A.**  $p < 0.001$  for WT versus Het-Veh (\*\*) and  $p = 0.04$  for Het-Veh  
519 versus Het-NSC (\*). In **C.**  $p = 0.047$  for WT versus Het-Veh (\*).  
520

521 Taken together, these data show long-term survival and differentiation of hNSCs into  
522 mainly neuronal lineages including a subset of mature-like MSNs and interneurons. The engrafted  
523 human cells establish connections with the host neurons and rescue specific electrophysiological  
524 and behavioral pathologies.

525

## 526 **Discussion**

527 A major challenge in regenerative medicine approaches to treat neurodegenerative diseases,  
528 including HD, is enabling long-term assessment of cell fate, functional properties and potential  
529 rescue of disease-associated phenotypes (Jia et al., 2020; Kim et al., 2020). Here we evaluated  
530 whether hNSCs implanted in the striata of zQ175 mice are viable and integrate into the host tissue  
531 at a time point of 8 months after grafting (equating to roughly a third of the captive's mouse 2-  
532 year lifespan). hNSCs survived and while most hNSCs had properties of immature neurons,  
533 approximately 20% of the cells evolved into more mature neurons with MSN- or interneuron-like  
534 properties and marker expression. Transplanted hNSCs receive synaptic inputs from neighboring  
535 cells or from the host, and innervate other hNSCs or host cells. Notably, grafted hNSCs increased  
536 striatal BDNF and pERK levels, reduced mHTT aggregated species, and ameliorated selected  
537 behavioral deficits of symptomatic zQ175 mice. Further, grafted cells modified host MSNs and  
538 rescued some of the altered membrane and synaptic properties observed in symptomatic mice.  
539 Thus, the mechanisms whereby implanted neurons rescue HD alterations appear to involve

540 improved striatal MSN membrane properties and circuit connectivity, BDNF production, and  
541 prevention of the accumulation of mHTT aggregating species

542 To the best of our knowledge, this is the first study to examine, long-term (up to 8 months),  
543 electrophysiological and morphological properties of grafted hNSCs in a genetic mouse model of  
544 adult-onset HD. Also, it is the first to demonstrate that mature hNSCs evolve into the main types  
545 of resident neuronal populations in the striatum including not just MSNs, but also GABAergic and  
546 cholinergic interneurons. This is important as a comprehensive reconstruction of the striatal  
547 circuitry requires not just the presence of MSNs but a wide variety of interneurons which also are  
548 significantly affected in HD (Cepeda et al., 2013; Reiner et al., 2013; Holley et al., 2015; Holley  
549 et al., 2019a; Holley et al., 2019b).

550 Previously we demonstrated that hNSCs are viable and integrate into the host striatum in a  
551 severe model of HD, the R6/2 (Holley et al., 2018; Reidling et al., 2018). However, due to rapid  
552 progression of the phenotype in these mice, examination of transplanted hNSCs was limited by  
553 time, about 4-6 weeks after implantation. We also reported data from the long-lived homozygous  
554 Q140 HD mouse model (Reidling et al., 2018), however, cell survival was not optimal. This most  
555 likely occurred due to insufficient immunosuppression methods, and measurements of cell  
556 differentiation or electrophysiology and connectivity visualized by EM were not feasible. Here we  
557 show that hNSCs can survive 8 months after injection, integrate into the host striatum, and improve  
558 some of the abnormal MSN membrane and synaptic properties of the heterozygous zQ175 HD  
559 model. Further, a subset of hNSCs become more mature and display properties similar to those of  
560 MSNs and some types of interneurons. EM and electrophysiology also suggest connections from  
561 the host may originate in the cortex and support a potential reconnection of the corticostriatal  
562 pathway that is lost during HD progression and that reconnection could contribute to restoration



563 of normal motor and cognitive functions. We hypothesize that the higher frequencies of synaptic  
564 inputs are due to the maturation and integration of hNSCs within the host tissue, as we did not  
565 observe hNSCs with these synaptic properties in our previous study using R6/2 hNSC-implanted  
566 mice. Unlike the R6/2 mice, MSNs from zQ175 mice do not exhibit epileptiform activity in the  
567 presence of BIC. The R6/2 mouse model demonstrates cortical hyperexcitability that can be  
568 exacerbated pharmacologically when inhibition is reduced (Cummings et al., 2009). This is  
569 reflected in R6/2 MSNs as large amplitude excitatory events followed by a barrage of high  
570 frequency, small amplitude events. We did not observe this electrophysiological phenotype in any  
571 of the zQ175 or WT MSNs.

572         Electrophysiologically, ~80% of hNSCs remained “immature”, despite surviving in the  
573 graft for 8 months. It is unknown why these cells do not differentiate. It is possible that with longer  
574 implantation time these cells also become more mature. We previously showed that transplanted  
575 hNSCs in R6/2 mice exhibited evidence of neuron-restricted progenitor markers DCX, Beta-III  
576 tubulin, and MAP-2 (Reidling et al., 2018). As hNSCs typically take several months to terminally  
577 differentiate during development, we expected to observe further differentiation of transplanted  
578 cells in the zQ175 8-month implant cohort. Interestingly, although we found this to be the case  
579 with some cell staining for the post-mitotic neuronal marker NeuN, as well as interneuron and  
580 MSN markers, we still observed clusters of ESI-017 hNSCs to be DCX positive after 8 months.  
581 Perhaps the DCX positive hNSCs have not received the signals to differentiate as many seem to  
582 be on the interior of the implant. It is important to note that the hNSCs appear to have received  
583 signals to stop proliferating (no Ki67 or EdU incorporation) and start down a path to differentiate  
584 (loss of nestin). Even though most cells did not fully differentiate and did not become more mature,

585 they still looked healthy and displayed neuronal properties, including the capacity to generate  
586 action potentials.

587         Although we can conclude that about 20% of the large hNSCs display physiological  
588 features of mature neurons, it is difficult to determine the specific cell-types based solely on their  
589 electrophysiological properties. Supporting evidence was provided by IHC and the presence of  
590 specific striatal neuronal markers. MSN-like hNSCs displayed  $\text{Ca}^{2+}$  currents typically observed in  
591 mature MSNs and IHC demonstrated the presence of DARPP-32 and Ctip2, which label striatal  
592 MSNs. Other hNSCs fired rhythmically, had increased input resistances (compared to MSNs),  
593 lacked characteristic  $\text{Ca}^{2+}$  currents, and received rhythmic GABAergic synaptic events, suggesting  
594 that these cells could be GABAergic interneurons. In support, IHC from these grafts indicated the  
595 presence of GAD and CR, specific interneuron markers. Some large hNSCs also displayed  
596 rhythmic bursting and low-threshold spikes, reminiscent of the somatostatin-expressing (LTS)  
597 interneurons (Tepper et al., 2018; Holley et al., 2019b). This observation is significant in terms of  
598 HD because these two interneuron subtypes are spared during disease progression. In fact, CR+  
599 interneurons appear increased in HD (Cicchetti and Parent, 1996), suggesting that they could have  
600 neuroprotective properties or alternatively they are selected for within the HD niche. Indeed, both  
601 somatostatin and calretinin have been shown to be neuroprotective (Kumar, 2008) and a study on  
602 grafted fetal striatal tissue demonstrated the presence of graft-derived neurons expressing DARPP-  
603 32, calretinin and somatostatin (Capetian et al., 2009). Another possibility is that some large  
604 hNSCs could have evolved into NPY interneurons. Interestingly, in HD, MSNs expressing NPY  
605 are spared and their numbers are even upregulated in HD patients (Wagner et al., 2016). Based on  
606 passive and active membrane properties, some cells also differentiated into large cholinergic

607 interneurons. In contrast, it seems unlikely that differentiated hNSCs became fast-spiking  
608 interneurons, at least in a mature state.

609 Results of cell fate in our HD mouse studies uniquely appear to follow a neuronal  
610 developmental path in contrast to a more gliogenic outcome, potentially due to the differentiation  
611 potential of the starting material or the transplantation niche (Goldberg et al., 2017; Qian et al.,  
612 2020; Yoon et al., 2020). A recent study using a rat model of HD induced by intrastriatal quinolinic  
613 acid injection, showed that human embryonic stem cell-derived MSN progenitors differentiate *in*  
614 *vitro*, undergo maturation, integrate into host circuits, and display properties similar to those of the  
615 host striatum 2 months after transplantation (Besusso et al., 2020), suggesting feasibility of  
616 transplanting differentiated MSN progenitors. Notably, behavioral studies in this model  
617 demonstrated functional recovery of some impaired sensorimotor responses but not in more  
618 complex behaviors (e.g., rotarod test). Some cells were proliferative, the yield of DARPP32/Ctip2  
619 double-labeled MSNs was relatively low, and there was some degree of contamination from  
620 cortical neurons. However, it is not known whether excitotoxicity models reflect the biochemical  
621 environment of the genetic mutation. Interestingly in that study, similar to ours, a low percentage  
622 of grafted cells expressed interneuronal markers (calbindin and calretinin), however these cells  
623 were not characterized electrophysiologically. Other strategies to generate striatal neurons are  
624 under investigation. For example, a recent study used an *in vivo* cell conversion technology to  
625 reprogram striatal astrocytes into GABAergic neurons through AAV-mediated ectopic expression  
626 of NeuroD1 and Dlx2 transcription factors (Wu et al., 2020). The striatal astrocyte-converted  
627 neurons showed action potentials and synaptic events, and projected their axons to the appropriate  
628 target regions. Behavioral analyses of these treated R6/2 mice showed a significant extension of  
629 life span and improvement of motor deficits (Wu et al., 2020).

630 In conclusion, our studies support future development of stem cell-based therapies. While  
631 mHTT/HTT-lowering strategies and gene editing are promising as therapies and are in various  
632 stages of clinical trials, a pressing issue is how to replace the striatal cell loss occurring in HD  
633 patients even prior to overt symptomatic onset. The present results support our previous findings  
634 that implanted cells may provide nursing effects through enhanced BDNF levels and reduction of  
635 pathological mHTT. Importantly, hNSCs establish synaptic contacts with host cells and among  
636 themselves, differentiate into a wide variety of striatal resident cells, and form the building blocks  
637 for circuit regeneration. Given the electrophysiological and EM results presented here, there is also  
638 promise that over time, transplanted cells can make beneficial synaptic connections and replace  
639 lost functions. Thus, our preclinical study demonstrates that hNSCs transplanted into a relevant  
640 HD model brain survive for long periods of time and may potentially be utilized for restoration of  
641 circuitry and cell replacement in the clinic.

642

## 643 **Methods**

644 **Mice:** All experimental procedures were in accordance with the Guide for the Care and Use of  
645 Laboratory Animals of the NIH and animal protocols were approved by Institutional Animal Care  
646 and Use Committees at the University of California Irvine (UCI), the University of California Los  
647 Angeles (UCLA), and the Portland VA Medical Center, AAALAC accredited institutions. zQ175  
648 heterozygous (Het) mice and their wildtype (WT) littermates were obtained from breeding  
649 colonies maintained at UCI (zQ175 Het mice had ~163-199 CAG repeats, Laragen, Culver City,  
650 CA). All mice were housed on a 12/12-hr light/dark schedule with *ad libitum* access to food and  
651 water. Mice were group-housed as mixed treatment groups and only males were single-housed for  
652 the running wheel test. Groups included: 10 male zQ175 Het hNSC, 8 female Het hNSC, 9 male

653 zQ175 Het vehicle, 9 female zQ175 Het vehicle, 7 male WT hNSC, 7 female WT hNSC, 6 male  
654 WT vehicle, 6 female WT vehicle.

655

656 **Cells:** The use of hESCs and hNSCs was approved by Human Stem Cell Research Oversight  
657 Committees (hSCRO) at UCI, UCLA, and UC Davis. ESI-017 is one of the six clinical-grade  
658 hESC lines generated from supernumerary embryos by the Singapore Stem Cell Consortium  
659 (Crook et al., 2007). Their use for therapeutic application adheres to US FDA regulations for use  
660 of human cells. Of those lines, four (including ESI-017) were chosen for the generation of Good  
661 Medical Practice (GMP) hESC banks for preclinical research based on the absence of human and  
662 non-human pathogens (Crook et al., 2007; Sivarajah et al., 2010). Subsequently, an hNSC line was  
663 differentiated from the GMP-grade hESC line ESI-017 as described previously (Reidling et al.,  
664 2018). ESI-017 hNSCs were acquired as frozen aliquots, thawed, and then cultured for a minimal  
665 time out of thaw (2-3 days) using the same media reagents as the GMP facility prior to dose  
666 administration. The cells were not passaged.

667

668 **Surgery:** Two and a half month-old zQ175 Het mice and WT littermates were anesthetized, placed  
669 in a stereotaxic frame and injected with either 100,000 hNSCs per side (2  $\mu$ l/injection) or vehicle  
670 (2  $\mu$ l HBSS with 20 ng/ml epidermal growth factor [STEMCELL Technologies, #78003] and  
671 human fibroblast growth factor [STEMCELL, #78006]) as a control treatment using a 5  $\mu$ l  
672 Hamilton microsyringe (33-gauge) and an injection rate of 0.5  $\mu$ l/min. Coordinates relative to  
673 Bregma were AP: 0.00, ML: +/- 2.00, and DV -3.25 mm. For immunosuppression, all mice  
674 received IP injections of cyclosporine (10 mg/kg, daily thereafter) and mouse CD4 Ab (10 mg/kg,



675 weekly thereafter) the day before surgery and continued until mice were sacrificed (8 months after  
676 implantation).

677

678 **Biochemical, Molecular, and Immunohistochemical Analyses:** Four male mice per group were  
679 given IP injections of EdU (Thermofisher Scientific) 24 hr prior to sacrifice. Mice were euthanized  
680 by pentobarbital overdose and perfused with 0.01 M PBS. Striatum and cerebral cortex were  
681 dissected out of the left hemisphere and flash-frozen for biochemical analysis. The other halves  
682 were post-fixed in 4% paraformaldehyde, cryoprotected in 30% sucrose, and cut at 40  $\mu$ m on a  
683 sliding vibratome for immunohistochemistry (IHC). Sections were rinsed three times and placed  
684 in blocking buffer for 1 hr (PBS, 0.02% Triton X-100, 5% goat serum), and primary antibodies  
685 placed in block overnight (ON) at 4°C. Sections were rinsed, incubated for 1 hr in Alexa Fluor  
686 secondary antibodies, and mounted using Fluoromount G (Southern Biotechnology). Primary  
687 antibodies used include: Anti-Ki67 (Abcam, ab16667), Anti-Ku80 (Abcam, ab80592), Anti-  
688 Nestin (Millipore Sigma, MAB5326), Anti-GFAP (Abcam, ab4674), Anti-DCX (Fisher Millipore,  
689 AB2253MI), Anti-NeuN (Abcam, ab177487), Anti-Calretinin (Abcam, ab16694), Anti-vGlut1  
690 (Abcam, ab180188), Anti-HNA (Abcam, ab191181), Anti-GAD65/67 (Abcam, ab49832), Anti-  
691 BetaIII tubulin (Abcam, ab78078), Anti-DARPP32 (Abcam, ab40802), Anti-Ctip2 (Abcam,  
692 ab233713). For IHC a minimum of four mice per group were analyzed. *DAB staining for ChAT:*  
693 Sections were rinsed three times then 30 min in 3% H<sub>2</sub>O<sub>2</sub> and 10% Methanol rinsed and placed in  
694 blocking buffer for 1 hr (TBS + 5% normal rabbit serum (NBS Vector S-5000) + 0.1% TritonX-  
695 100), then primary antibody (goat anti-ChAT 9 Millipore AB144P) placed in block overnight at  
696 4°C. Sections were rinsed, incubated for 1 hr in secondary antibody (rabbit anti-goat biotinylated  
697 secondary), incubated in ABC solution (Vector PK-6100) for 1 hr at RT then 1-3min in DAB,

698 rinse and mount tissue on slide. *Confocal Microscopy*: Sections were imaged with Bio-Rad  
699 Radiance 2100 confocal system using lambda-strobing mode. Images represent either single  
700 confocal z-slices or z-stacks. *Whole cell tissue lysis*: Lysis was performed in RIPA buffer  
701 supplemented with protease inhibitors (Complete Mini, Roche Applied Science), 0.1 mM PMSF,  
702 25 mM NEM, 1.5 mM aprotinin, and 23.4 mM leupeptin by douncing then sonicated for 10  
703 seconds, 3 times at 40% amplitude on ice. Samples were quantified using Lowry protein assay.  
704 *Soluble/Insoluble Fractionation*: Striatal tissue was processed as described previously (Ochaba et  
705 al., 2016). *Western analysis*: RIPA lysates were resolved by reducing and running 60µg of protein  
706 on 4-12% Bis-Tris Poly-Acrylamide gels (PAGE). Antibodies: Anti-BDNF (Santa Cruz  
707 Biotechnology, clone N-20, for mature BDNF, cat.no.sc-546), Anti-ERK (Cell Signaling  
708 Technology, cat.no. 9102), Anti-pERK (Cell Signaling Technology, cat.no. 9106), Anti-alpha  
709 tubulin (Sigma-Aldrich, cat.no. T6074). Quantification of bands was performed using software  
710 from the NIH program ImageJ and densitometry application. 50µg of reduced, insoluble protein  
711 from Insoluble Fractions were resolved on 3-8% Tris-Acetate Poly-Acrylamide gels. Membranes  
712 were blocked in Starting block (Invitrogen) for 20 minutes at room temperature and probed in  
713 primary antibody overnight at 4°C. Insoluble protein was quantified as relative protein abundance  
714 as previous (Ochaba et al., 2016). Antibodies: Anti-HTT (Millipore, #MAB5492;  
715 RRID: AB\_347723).

716

717 **Behavioral Tests**: Males and females were used except for the running wheel, where only males  
718 were used since estrus cycle influences running activity. Genotypes or treatments were unknown  
719 to the experimenter. All tests were done during the light phase except for the running wheel, where  
720 mice were allowed 24 hr free access to the task. Running wheel data are only described for the

721 dark phase. Slope of motor learning was calculated as mean nightly running wheel rotations per 3  
722 minutes on night 5 minus night 2 divided by total number of nights (3) for initial and night 13  
723 minus night 2 divided by total number of nights (11) for overall. Behavioral tasks, running wheel  
724 and open field, were performed in a manner to those previously described (Hickey et al., 2008;  
725 Reidling et al., 2018).

726

727 **Electrophysiology:** For electrophysiological studies we used 12 female mice (10.5 month-old)  
728 shipped live to UCLA from UCI. Groups included: 4 zQ175 Het hNSC, 4 zQ175 Het vehicle, 2  
729 WT hNSC, 2 WT vehicle. Mice were anesthetized and transcardially perfused with high sucrose-  
730 based slicing solution. Coronal slices (300  $\mu\text{m}$ ) were transferred to an incubating chamber  
731 containing standard artificial cerebrospinal fluid (ACSF). MSNs and hNSCs were visualized using  
732 infrared illumination with differential interference contrast optics (IR-DIC). All recordings were  
733 performed in or around the injection site (recorded MSNs were adjacent to the graft,  $\sim$ 150-250  
734  $\mu\text{m}$ ). Biocytin (0.2%) was added to the patch pipette for cell visualization and location of recorded  
735 cells. Spontaneous postsynaptic currents were recorded in the whole-cell patch clamp  
736 configuration in ACSF. Membrane currents were recorded in gap-free mode. Cells were voltage-  
737 clamped at +10mV and spontaneous inhibitory postsynaptic currents (sIPSCs) were recorded in  
738 ACSF. Spontaneous excitatory postsynaptic currents (sEPSCs) from grafted cells were recorded  
739 in ACSF at -70 mV (baseline). sEPSCs from MSNs, were recorded in the presence of the GABA<sub>A</sub>  
740 receptor blocker, bicuculline methobromide (BIC, 10  $\mu\text{M}$ , Tocris, Minneapolis, MN) to better  
741 isolate glutamatergic events. Spontaneous synaptic currents were analyzed using the MiniAnalysis  
742 software (version 6.0, Synaptosoft, Fort Lee, NJ). To evoke responses in grafted cells, we used a  
743 monopolar glass electrode (impedance 1 M $\Omega$ ) which was placed 200-300  $\mu\text{m}$  lateral to the graft.

744 Following recordings, slices were fixed with 4% PFA, then transferred to 30% sucrose at 4°C until  
745 IHC processing. To identify biocytin-filled recorded cells and hNSCs, fixed slices were washed,  
746 permeabilized with triton (0.7%) and blocked for 4 h, followed by incubation with SC121 (1:1000).  
747 After washing, slices were incubated in goat, anti-mouse Alexa-488 (1:1000, Life Technologies,  
748 Carlsbad, CA Catalog #:A-11001) and streptavidin conjugated with Alexa-594 (1:1000, Life  
749 Technologies Catalog #: S11227). Slices were washed, mounted, and cells visualized with a Zeiss  
750 Apotome confocal microscope.

751

752 **Electron Microscopy (EM):** Female zQ175 mice implanted with hNSCs for 8 months (n=3 per  
753 group) at UCI were sent live to the Portland VA Medical Center. Mice were anesthetized and  
754 perfused with EM fixative (2.5% glutaraldehyde, 0.5% paraformaldehyde, and 0.1% picric acid in  
755 0.1 M phosphate buffer [pH 7.4]). Brains were then collected and further processed in a Pelco  
756 Biowave Pro+ (Ted Pella, Inc, Redding, CA), as previously reported (Moore et al., 2020), and then  
757 washed in PBS and stored overnight at 4° C. Striatum containing hNSCs (equivalent to +1.4 to  
758 +0.14 mm from Bregma) (Franklin and Paxinos, 2007) was cut at 60 µm using a vibratome (Leica  
759 Microsystems). After pre-embed IHC of the striatum using diaminobenzidine (DAB) (Sigma, St  
760 Louis, MO) or ImmPACT® VIP Substrate, Peroxidase (HRP) (Cat #: SK-4605)(Vector Labs,  
761 Burlingame, CA), hNSC antibody (SC121, 1:100; Takara: Cat #: Y40410) and vGlut 1 (vesicular  
762 glutamate transporter 1) antibody (1:000; Synaptic Systems, Germany, Cat #: 135-303), the tissue  
763 was processed for EM as previously described (Walker et al., 2012; Parievsky et al., 2017; Reidling  
764 et al., 2018; Moore et al., 2020). Two striatal slices were selectively double labeled for SC121  
765 (DAB) and vGlut1(VIP) to determine if vGlut1 labeled terminals originating from the cortex  
766 (Kaneko et al., 2002) innervated the implantation site. Striatal slices were embedded flat between

767 two sheets of ACLAR (Electron Microscopy Sciences, Hatfield, PA) overnight in a 60°C oven to  
768 polymerize the resin. The area containing hNSCs was micro-dissected from the embedded slice  
769 and superglued onto a block for thin sectioning. Photographs were taken on a JEOL 1400  
770 transmission electron microscope (JEOL, Peabody, MA) of DAB labeled structures (i.e., SC121)  
771 and for a small number of sections, double labeled with DAB (SC121) and VIP (vGlut1)-labeled  
772 structures (i.e., hNSC-labeled cells, dendrites, nerve terminals). The DAB labeled structures (i.e.,  
773 SC121) were photographed both within and located ~0.25 mm outside of the implantation zone,  
774 at a final magnification of 46,200 using a digital camera (AMT, Danvers, MA). Since the DAB  
775 and DAB/VIP labeling was restricted to the leading edge of the thin-sectioned tissue, only the area  
776 showing DAB and DAB/VIP labeling was photographed. The percentage of SC121/DAB-labeled  
777 asymmetrical and symmetrical synaptic contacts onto dendrites and spines within and outside the  
778 implant area was quantified.

779

780 **Statistical Analysis:** Results are from a single cohort except for Western blots for BDNF and  
781 pERK/ERK and IHC for ChAT, which were from a different subset. Numbers were determined to  
782 have sufficient power using an analysis prior to the study. Assessment of differences in outcome  
783 were based upon previous experience and published results (Hockly et al., 2003; Hickey et al.,  
784 2005) for HD models, and applying power analysis (G Power [[http://www.psych.uni-  
785 duesseldorf.de/abteilungen/aap/gpower3/](http://www.psych.uni-duesseldorf.de/abteilungen/aap/gpower3/)]) led us to a minimal n=5 for behavior and n=3 for  
786 biochemical analysis. Statistical significance was achieved as described using rigorous analysis.  
787 All findings are reproducible. Experiments were performed at least 3 times using at least 3 different  
788 mice (biological replicates) and in specific cases tissue from one mouse was used multiple times  
789 (technical replicates); for example, in IHC at least 3 different mouse brains were used and multiple



790 sections from each brain were examined to obtain data. Multiple statistical methods are further  
791 detailed above, in figure legends, or in Supplementary Experimental Procedures. Since the EM  
792 data are based on 3 implanted zQ175 mice, and not comparing them against the WT mice, the  
793 percentages reported are a comparison within a single group of 3 experimental mice, therefore,  
794 there was no statistical comparison. Statistical tests for behavioral tasks used one-way ANOVA  
795 followed by Tukey's HSD test with Scheffé, Bonferroni, and Holm multiple comparison *post hoc*  
796 methods. Data met the assumptions of the statistical tests used, and p values <0.05 were considered  
797 significant. All mice were randomly assigned and tasks performed in a random manner with  
798 individuals blinded to genotypes and treatment. Statistical comparisons of densitometry results  
799 were performed by one-way ANOVA followed by Tukey HSD and Bonferroni *post hoc* tests. For  
800 electrophysiology data, all statistical analyses were performed using SigmaPlot 13.0 software.  
801 Differences between multiple group means were assessed with appropriate one-way ANOVAs  
802 followed by Bonferroni *post hoc* tests, Kruskal-Wallis one-way ANOVA on ranks followed by  
803 Holm-Sidak *post hoc* tests or Student's *t*-tests (unpaired) when only two groups were compared.  
804 Significance levels in the figures are given as specific p-values and data are expressed as mean ±  
805 SEM.

806

## 807 **Acknowledgments**

808 Funding was provided by the California Institute for Regenerative Medicine (CIRM ETAI TR2-  
809 01841), and NIH grants NS096994 and U54HD087101 (MSL).

810 We thank BioTime, Inc and AgeX for the ESI-017 cell line and the UC Davis Flow Cytometry  
811 Shared Resource, 2921 Stockton Blvd., Suite 1300/1670 Sacramento, CA 95817 for flow analysis.

812 We also thank the UCI Institute for Memory Impairments and Neurological Disorders, the Sue and

813 Bill Gross Stem Cell Center and the Optical Biology Shared Resource of the Cancer Center  
814 Support Grant (CA-62203) at the University of California, Irvine for facilities and assistance in  
815 carrying out studies.

816

817 **Author contributions:** J.C.R., S.M.H., C.C., M.S.L., L.M.T. designed experiments and analyzed  
818 data. J.C.R., S.M.H., C.C., L.M.T., M.S.L. wrote the manuscript. S.Y., A.L., I.O. performed  
819 experiments in mice, A.L. and M.N. did IHC and E.S.M. and J.C.R. performed analyses. S.M.H.,  
820 C.C. performed electrophysiology and analyzed data with guidance from M.S.L. C.M. performed  
821 EM with guidance from C.K.M. L.K. cultured hNSCs at UCI. B.F., D.C.-B. and G.B. supplied  
822 ESI-017 hNSCs and characterizations from GMP facility at UCD.

823

824 **Conflicts of interest:** The authors declare they have no conflict of interest, financial or otherwise.

825

826 **Supplementary Figures**

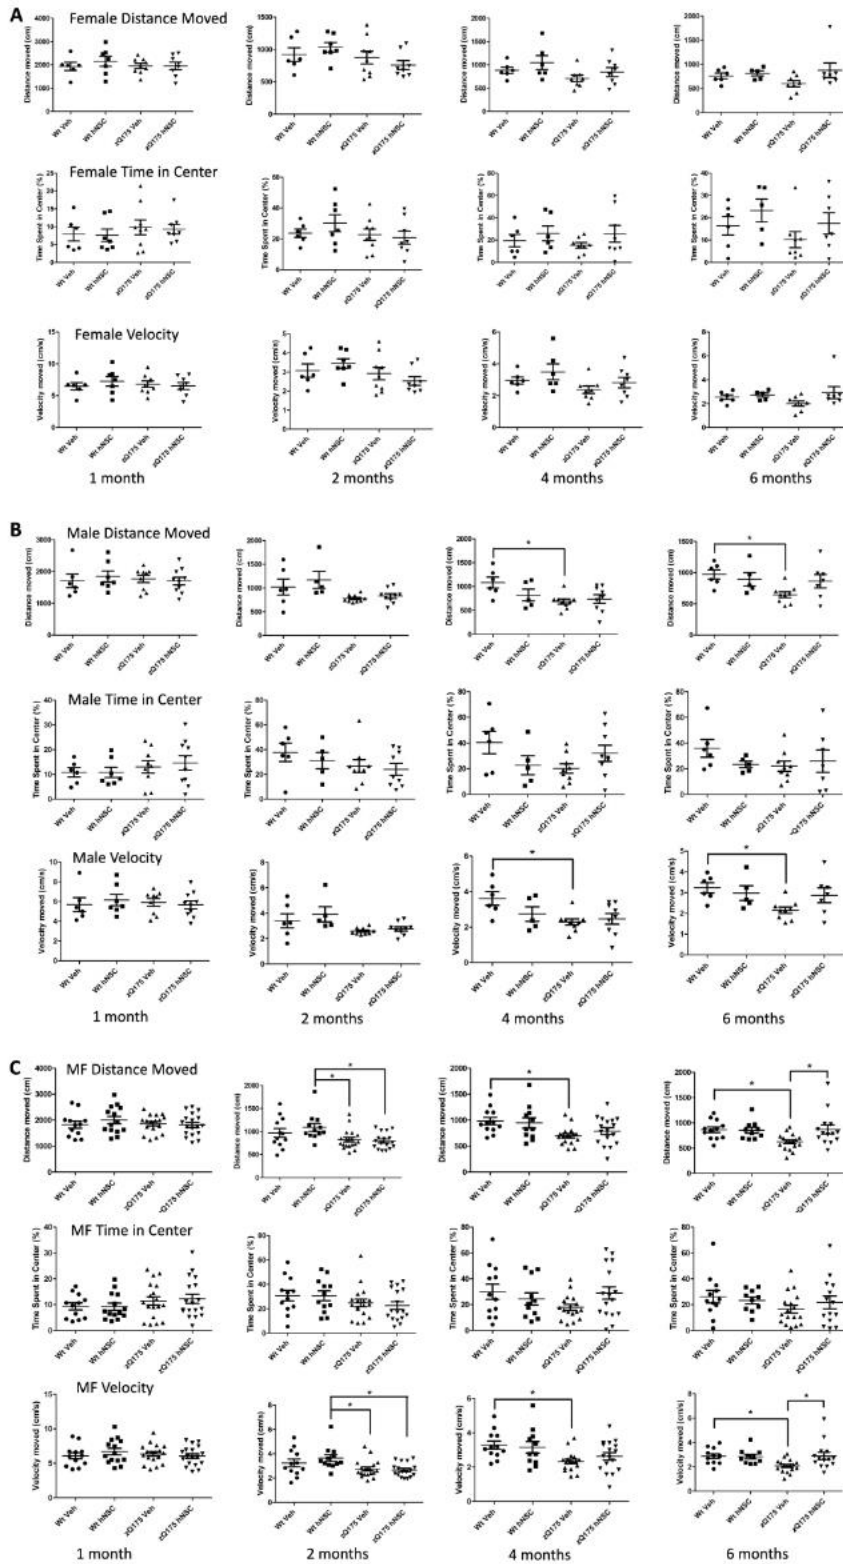

827

828 **Supp. Figure 1: Open Field behavior.** Total distance traveled in the open field 6 months post  
829 implant. Mice were subjected to the open field and total distance in centimeters of their respective  
830 tracks were combined and statistically analyzed to visualize any differences in ambulation. Time  
831 spent in center was also measured. In addition, velocity traveled in centimeters/sec of their  
832 respective tracks were combined and statistically analyzed to visualize any differences in time of  
833 ambulation. **A. Females B. Males and C. Males and Females combined.** Groups for open field at  
834 1 month included: 10 male zQ175 Het hNSC, 8 female Het hNSC, 9 male zQ175 Het veh, 9 female  
835 zQ175 Het veh, 7 male WT hNSC, 7 female WT hNSC, 6 male WT veh, 6 female WT veh. Groups  
836 for open field at 6 months included: 7 male zQ175 Het hNSC, 7 female Het hNSC, 9 male zQ175  
837 Het veh, 8 female zQ175 Het veh, 5 male WT hNSC, 5 female WT hNSC, 6 male WT veh, 6  
838 female WT veh. Results are expressed as the mean  $\pm$  S.E.M with one-way ANOVA Bonferroni  
839 post test: \*In order of graphs  $p=0.03$ ,  $p=0.04$ ,  $p=0.03$ ,  $p=0.04$ ,  $p=0.01$ ,  $p=0.01$ ,  $p=0.01$ ,  $p=0.01$ ,  
840  $p=0.01$ ,  $p=0.01$ .  
841

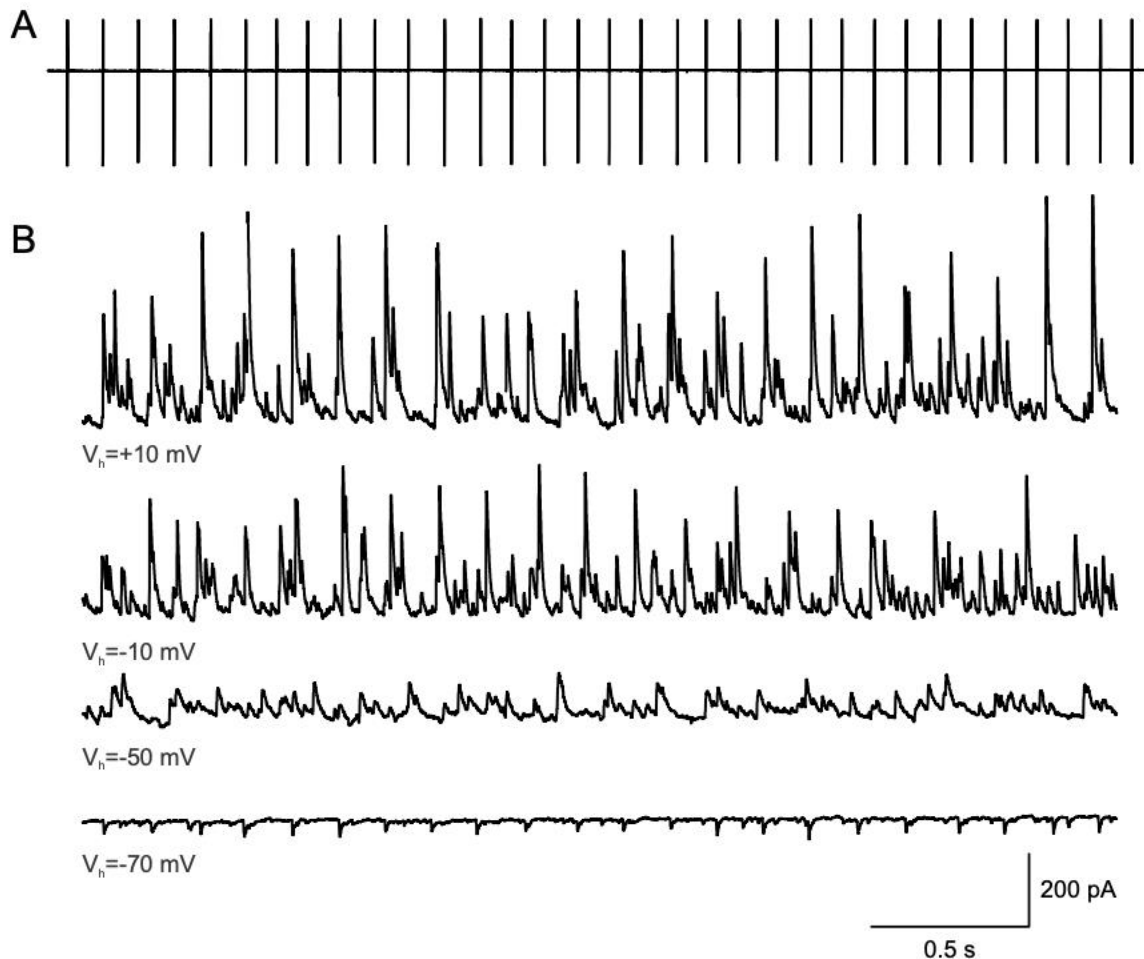

842

843 **Suppl. Figure 2: hNSCs display rhythmic activities.** **A.** In cell-attached mode this cell from a  
844 zQ175 mouse displayed autonomous, rhythmic firing activity. **B.** In voltage clamp mode,  
845 spontaneous, rhythmic synaptic events can be observed at different holding potentials (bottom 4  
846 traces). Spontaneous synaptic events were tentatively assumed to be GABAergic since the reversal

847 potential for GABA occurred at  $\sim -60$  mV. This type of activity is not observed in normal  
848 conditions in striatal MSNs and this cell was assumed to be interneuron-like.  
849

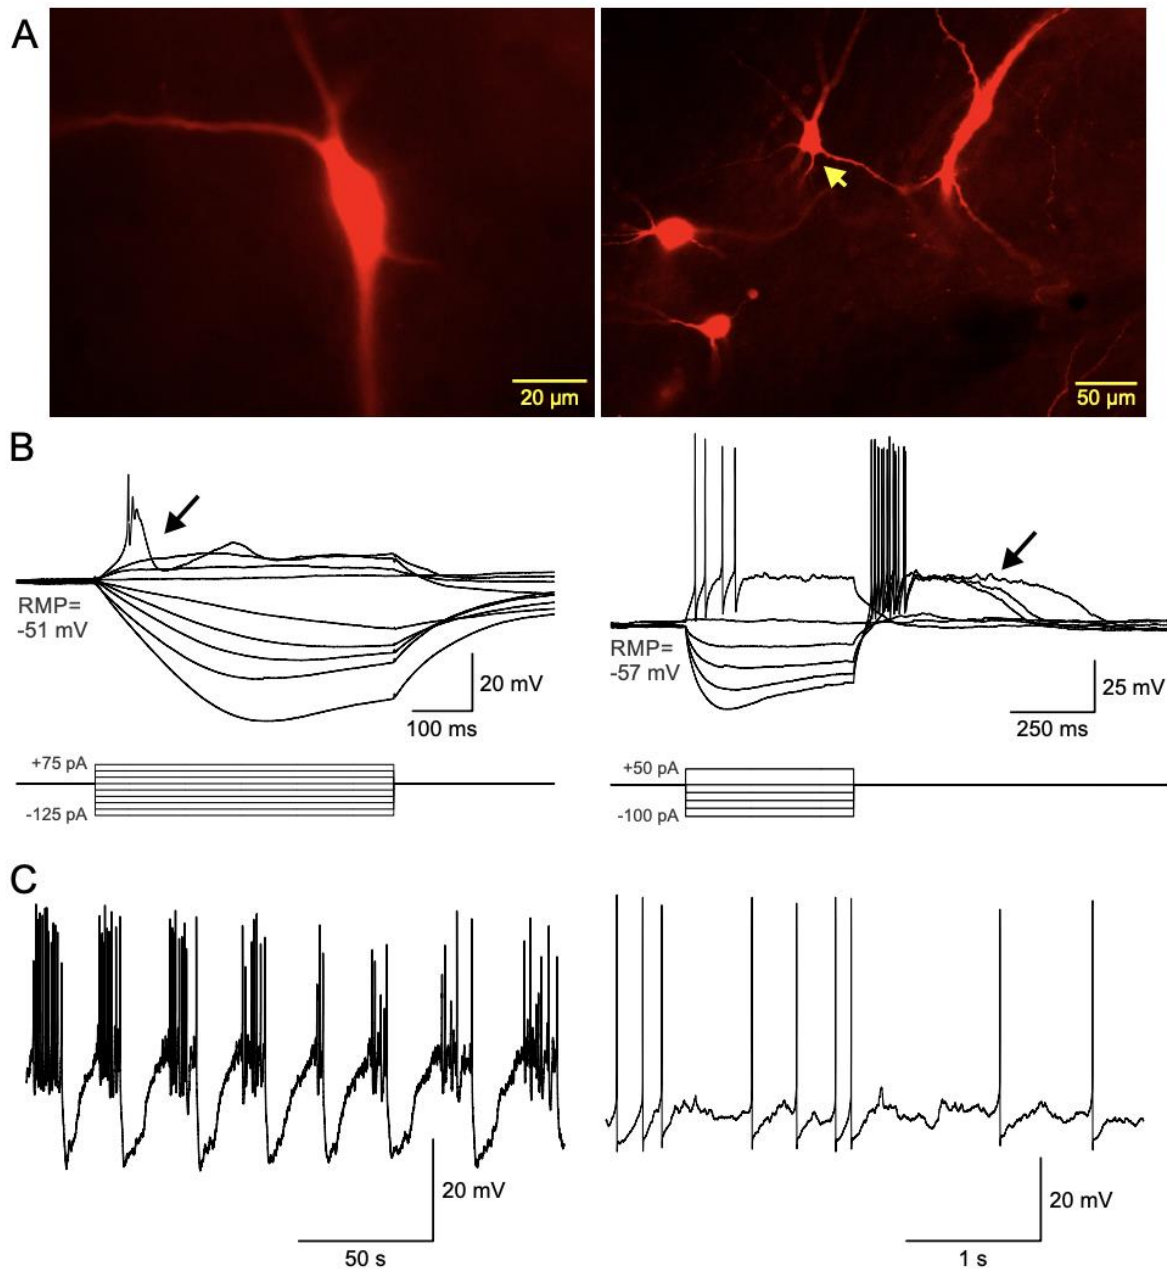

850

851 **Suppl. Figure 3: A. Large hNSCs from two different zQ175 implanted mice were recorded**  
852 **and filled with biocytin.** The hNSC on the left panel and the cell with the yellow arrow on the  
853 right panel displayed LTS-like interneuron properties. **B.** Traces are electrophysiological  
854 recordings in current clamp mode. Both cells displayed prominent inward rectification and low-  
855 threshold  $\text{Ca}^{2+}$  spikes (arrows). **C.** Upon hyperpolarization by negative current injection the cell  
856 on the left displayed rhythmic membrane oscillations and bursts of action potentials. The



857 interneuron-like hNSC on the right displayed low-threshold  $\text{Ca}^{2+}$  spikes and fired spontaneously  
858 at resting membrane potential (-57 mV). Both cells shared similarities with striatal LTS  
859 (somatostatin-expressing) interneurons.  
860

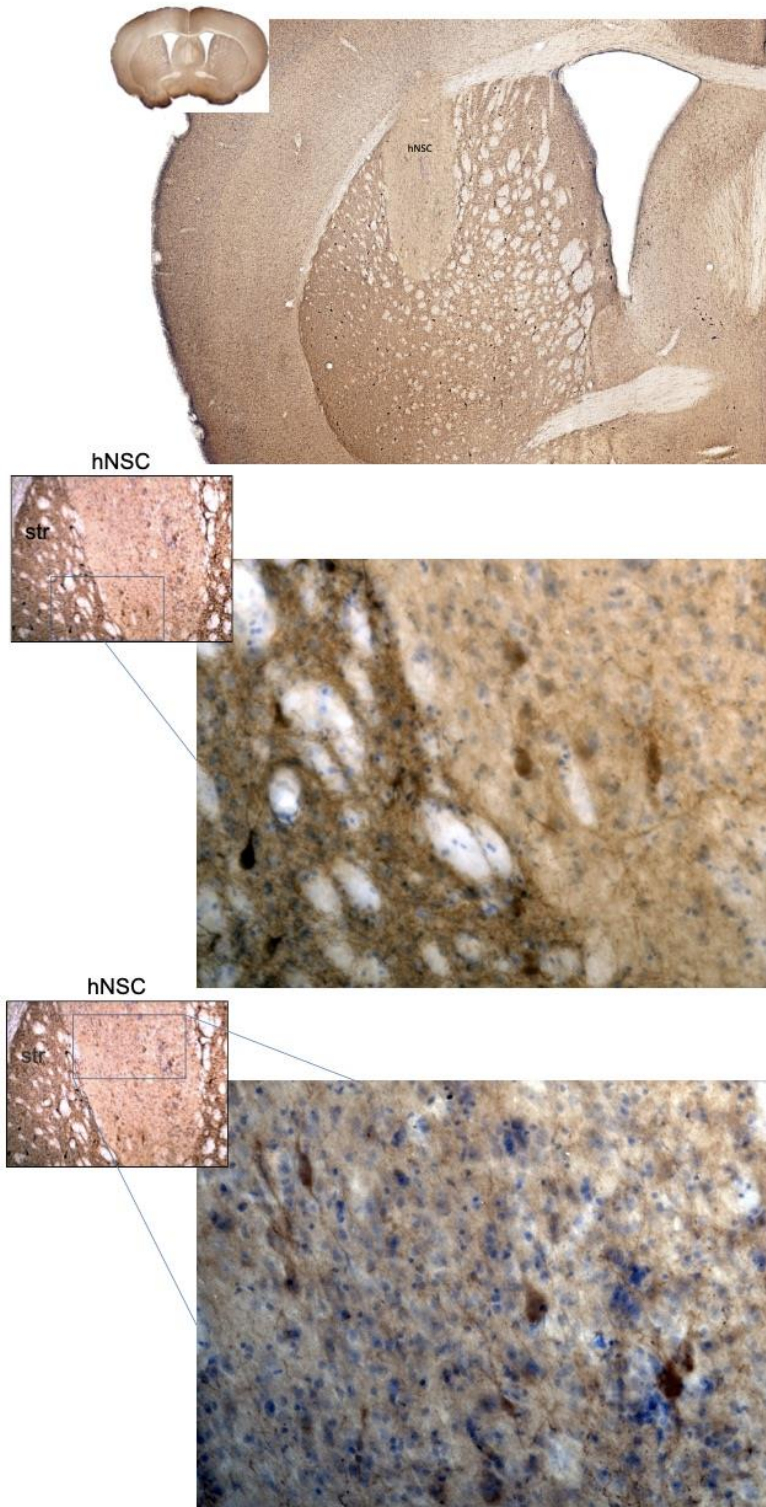

861

862 **Suppl. Figure 4: IHC for ChAT demonstrated that some hNSCs express the cholinergic**  
863 **marker. 5x mag. of hNSCs in zQ175 showing overall implant site. 10X mag. then box indicating**  
864 **20x mag. showing area in and around implant site that has DAB positive (brown) ChAT expressing**  
865 **cells.**  
866

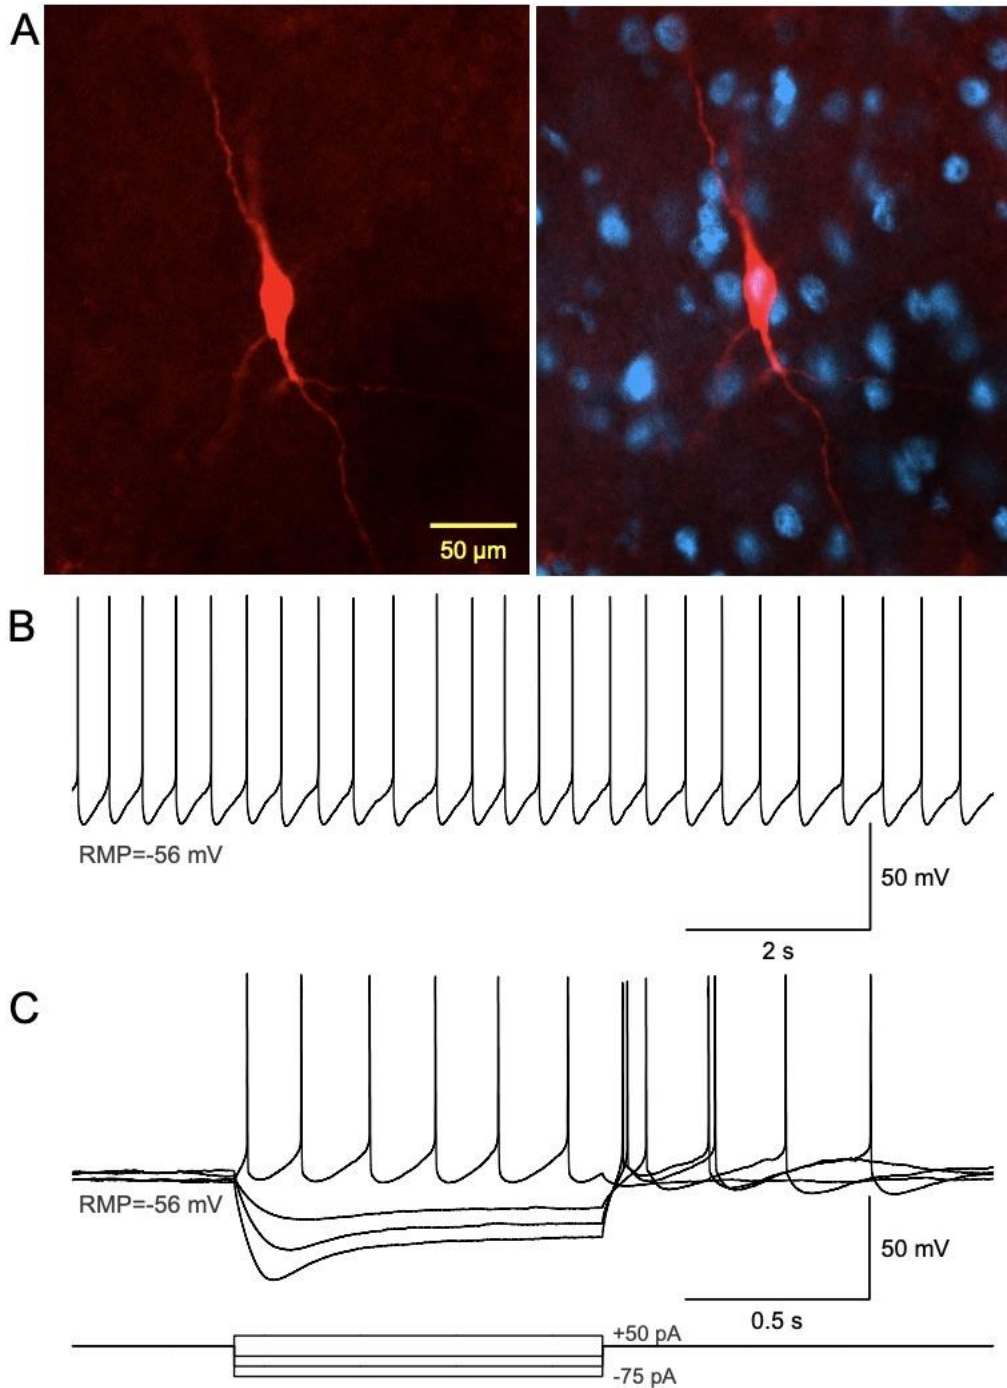

867

868 **Suppl. Figure 5:** **A.** Left panel shows a biocytin-filled, large hNSC. The right panel illustrates co-  
869 colocalization of the human marker Ku80 (blue) and biocytin (red). **B.** In current clamp mode, this  
870 cell fired spontaneous, rhythmic action potentials (2-3 Hz), typical of striatal cholinergic  
871 interneurons. **C.** Hyperpolarizing the cell also demonstrated delayed inward rectification, another  
872 signature of striatal cholinergic interneurons.  
873

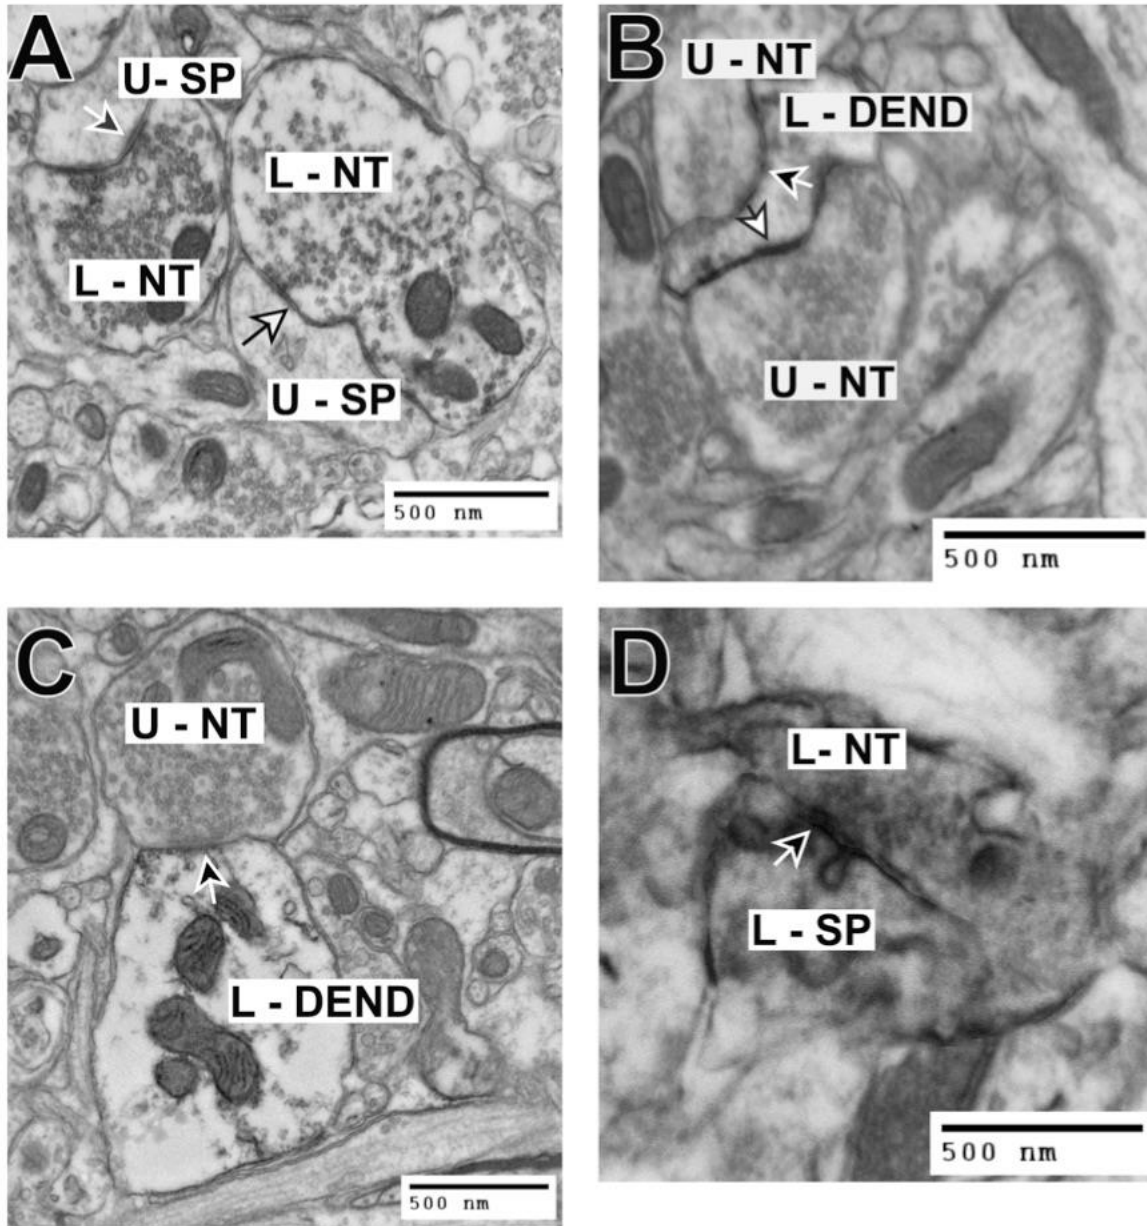

874

875 **Suppl. Figure 6: Striatal synaptic contacts located outside the stem cell implantation zone.**  
876 **A.** A labeled nerve terminal (L-NT) is making either an asymmetrical synaptic contact (black  
877 arrow with white outline) or a symmetrical contact (white arrow with black outline) with an  
878 underlying hNSC negative/unlabeled dendritic spine (U-SP)(note the darkened DAB reaction



879 product within the nerve terminals). The hNSC labeled nerve terminals originate from the  
880 implanted stem cells, while the unlabeled dendritic spines originate from the host striatum. **B.**  
881 Unlabeled nerve terminals (U-NT) are making either an asymmetrical synaptic contact (black  
882 arrow with white outline) or a symmetrical contact (white arrow with black outline) with an  
883 underlying hNSC positive/labeled dendrite (L-DEN) (note the darkened DAB reaction product  
884 within the dendrite). The hNSC labeled dendrite originates from the implanted stem cells, while  
885 the unlabeled nerve terminals originate from the host striatum. **C.** Unlabeled nerve terminal (U-  
886 NT) making an asymmetrical synaptic contact (arrow) with an underlying hNSC positive/labeled  
887 dendrite (L-DEND)(note the darkened DAB reaction product within the dendrite). The hNSC  
888 labeled dendrite originates from the implanted stem cells, while the unlabeled nerve terminal  
889 originates from the host striatum. **D.** Labeled nerve terminal (L-NT) is making a symmetrical  
890 synaptic contact (arrow) with an underlying hNSC positive/labeled dendritic spine (L-SP) (note  
891 the darkened DAB reaction product within the nerve terminal and spine). The hNSC labeled nerve  
892 terminal and dendritic spine originate from the implanted stem cells.

893

## 894 **References**

895

896 Bates G, Harper PS, Jones L (2002) Huntington's disease, 3rd Edition. Oxford ; New York: Oxford  
897 University Press.

898 Besusso D et al. (2020) Stem Cell-Derived Human Striatal Progenitors Innervate Striatal Targets  
899 and Alleviate Sensorimotor Deficit in a Rat Model of Huntington Disease. Stem cell  
900 reports.

901 Capetian P, Knoth R, Maciaczyk J, Pantazis G, Ditter M, Bokla L, Landwehrmeyer GB, Volk B,  
902 Nikkhah G (2009) Histological findings on fetal striatal grafts in a Huntington's disease  
903 patient early after transplantation. *Neuroscience* 160:661-675.

904 Cepeda C, Andre VM, Yamazaki I, Wu N, Kleiman-Weiner M, Levine MS (2008) Differential  
905 electrophysiological properties of dopamine D1 and D2 receptor-containing striatal  
906 medium-sized spiny neurons. *Eur J Neurosci* 27:671-682.

907 Cepeda C, Galvan L, Holley SM, Rao SP, Andre VM, Botelho EP, Chen JY, Watson JB,  
908 Deisseroth K, Levine MS (2013) Multiple sources of striatal inhibition are differentially  
909 affected in Huntington's disease mouse models. *J Neurosci* 33:7393-7406.

910 Choi KA, Hong S (2017) Induced neural stem cells as a means of treatment in Huntington's  
911 disease. *Expert opinion on biological therapy* 17:1333-1343.

912 Cicchetti F, Parent A (1996) Striatal interneurons in Huntington's disease: selective increase in the  
913 density of calretinin-immunoreactive medium-sized neurons. *Mov Disord* 11:619-626.

914 Connor B (2018) Concise Review: The Use of Stem Cells for Understanding and Treating  
915 Huntington's Disease. *Stem cells* 36:146-160.

916 Crook JM, Peura TT, Kravets L, Bosman AG, Buzzard JJ, Horne R, Hentze H, Dunn NR,  
917 Zweigerdt R, Chua F, Upshall A, Colman A (2007) The generation of six clinical-grade  
918 human embryonic stem cell lines. *Cell stem cell* 1:490-494.

919 Cummings DM, Andre VM, Uzgil BO, Gee SM, Fisher YE, Cepeda C, Levine MS (2009)  
920 Alterations in cortical excitation and inhibition in genetic mouse models of Huntington's  
921 disease. *J Neurosci* 29:10371-10386.

922 El-Akabawy G, Rattray I, Johansson SM, Gale R, Bates G, Mado M (2012) Implantation of  
923 undifferentiated and pre-differentiated human neural stem cells in the R6/2 transgenic  
924 mouse model of Huntington's disease. *BMC Neurosci* 13:97.

- 925 Franklin KBJ, Paxinos G (2007) *The Mouse Brain in Stereotaxic Coordinates*, 3rd Edition:  
926 Academic Press.
- 927 Gertler TS, Chan CS, Surmeier DJ (2008) Dichotomous anatomical properties of adult striatal  
928 medium spiny neurons. *J Neurosci* 28:10814-10824.
- 929 Ghosh R, Tabrizi SJ (2018) Huntington disease. *Handbook of clinical neurology* 147:255-278.
- 930 Goldberg NRS, Marsh SE, Ochaba J, Shelley BC, Davtayan H, Thompson LM, Steffan JS,  
931 Svendsen CN, Blurton-Jones M (2017) Human Neural Progenitor Transplantation Rescues  
932 Behavior and Reduces alpha-Synuclein in a Transgenic Model of Dementia with Lewy  
933 Bodies. *Stem Cells Transl Med* 6:1477-1490.
- 934 Harper PS, Jones L (2002) Huntington's disease: Genetic and molecular studies. In: *Huntington's*  
935 *Disease, Third Edition* (Bates GP, Harper PS, Jones L, eds), pp 113-158. Oxford: Oxford  
936 University Press.
- 937 Heikkinen T, Lehtimäki K, Vartiainen N, Puolivali J, Hendricks SJ, Glaser JR, Bradaia A, Wadel  
938 K, Touller C, Kontkanen O, Yrjanheikki JM, Buisson B, Howland D, Beaumont V, Munoz-  
939 Sanjuan I, Park LC (2012) Characterization of neurophysiological and behavioral changes,  
940 MRI brain volumetry and 1H MRS in zQ175 knock-in mouse model of Huntington's  
941 disease. *PLoS One* 7:e50717.
- 942 Hickey MA, Gallant K, Gross GG, Levine MS, Chesselet MF (2005) Early behavioral deficits in  
943 R6/2 mice suitable for use in preclinical drug testing. *Neurobiol Dis* 20:1-11.
- 944 Hickey MA, Kosmalska A, Enayati J, Cohen R, Zeitlin S, Levine MS, Chesselet MF (2008)  
945 Extensive early motor and non-motor behavioral deficits are followed by striatal neuronal  
946 loss in knock-in Huntington's disease mice. *Neuroscience* 157:280-295.
- 947 Hockly E, Woodman B, Mahal A, Lewis CM, Bates G (2003) Standardization and statistical  
948 approaches to therapeutic trials in the R6/2 mouse. *Brain Res Bull* 61:469-479.
- 949 Holley SM, Galvan L, Kamdjou T, Cepeda C, Levine MS (2019a) Striatal GABAergic interneuron  
950 dysfunction in the Q175 mouse model of Huntington's disease. *Eur J Neurosci* 49:79-93.
- 951 Holley SM, Galvan L, Kamdjou T, Dong A, Levine MS, Cepeda C (2019b) Major Contribution  
952 of Somatostatin-Expressing Interneurons and Cannabinoid Receptors to Increased GABA  
953 Synaptic Activity in the Striatum of Huntington's Disease Mice. *Frontiers in synaptic*  
954 *neuroscience* 11:14.
- 955 Holley SM, Joshi PR, Parievsky A, Galvan L, Chen JY, Fisher YE, Huynh MN, Cepeda C, Levine  
956 MS (2015) Enhanced GABAergic Inputs Contribute to Functional Alterations of  
957 Cholinergic Interneurons in the R6/2 Mouse Model of Huntington's Disease.  
958 *ENEURO*:0008-0014.
- 959 Holley SM, Kamdjou T, Reidling JC, Fury B, Coleal-Bergum D, Bauer G, Thompson LM, Levine  
960 MS, Cepeda C (2018) Therapeutic effects of stem cells in rodent models of Huntington's  
961 disease: Review and electrophysiological findings. *CNS Neurosci Ther* 24:329-342.
- 962 Indersmitten T, Tran CH, Cepeda C, Levine MS (2015) Altered excitatory and inhibitory inputs to  
963 striatal medium-sized spiny neurons and cortical pyramidal neurons in the Q175 mouse  
964 model of Huntington's disease. *J Neurophysiol* 113:2953-2966.
- 965 Jia N, Chong J, Sun L (2020) Application of stem cell biology in treating neurodegenerative  
966 diseases. *The International journal of neuroscience*:1-11.
- 967 Kaneko T, Fujiyama F, Hioki H (2002) Immunohistochemical localization of candidates for  
968 vesicular glutamate transporters in the rat brain. *J Comp Neurol* 444:39-62.
- 969 Kim TW, Koo SY, Studer L (2020) Pluripotent Stem Cell Therapies for Parkinson Disease: Present  
970 Challenges and Future Opportunities. *Front Cell Dev Biol* 8:729.

- 971 Kumar U (2008) Somatostatin in medium-sized aspiny interneurons of striatum is responsible for  
972 their preservation in quinolinic acid and N-methyl-D-aspartate-induced neurotoxicity. *J*  
973 *Mol Neurosci* 35:345-354.
- 974 Mangiarini L, Sathasivam K, Seller M, Cozens B, Harper A, Hetherington C, Lawton M, Trottier  
975 Y, Lehrach H, Davies SW, Bates GP (1996) Exon 1 of the HD gene with an expanded  
976 CAG repeat is sufficient to cause a progressive neurological phenotype in transgenic mice.  
977 *Cell* 87:493-506.
- 978 Menalled LB, Kudwa AE, Miller S, Fitzpatrick J, Watson-Johnson J, Keating N, Ruiz M, Mushlin  
979 R, Alosio W, McConnell K, Connor D, Murphy C, Oakeshott S, Kwan M, Beltran J,  
980 Ghavami A, Brunner D, Park LC, Ramboz S, Howland D (2012) Comprehensive  
981 behavioral and molecular characterization of a new knock-in mouse model of Huntington's  
982 disease: zQ175. *PLoS One* 7:e49838.
- 983 Moore C, Xu M, Bohlen JK, Meshul CK (2020) Differential ultrastructural alterations in the  
984 Vglut2 glutamatergic input to the substantia nigra pars compacta/pars reticulata following  
985 nigrostriatal dopamine loss in a progressive mouse model of Parkinson's disease. *Eur J*  
986 *Neurosci*.
- 987 Ochaba J, Monteys AM, O'Rourke JG, Reidling JC, Steffan JS, Davidson BL, Thompson LM  
988 (2016) PIA1 Regulates Mutant Huntingtin Accumulation and Huntington's Disease-  
989 Associated Phenotypes In Vivo. *Neuron* 90:507-520.
- 990 Parievsky A, Moore C, Kamdjou T, Cepeda C, Meshul CK, Levine MS (2017) Differential  
991 electrophysiological and morphological alterations of thalamostriatal and corticostriatal  
992 projections in the R6/2 mouse model of Huntington's disease. *Neurobiol Dis* 108:29-44.
- 993 Plotkin JL, Day M, Peterson JD, Xie Z, Kress GJ, Rafalovich I, Kondapalli J, Gertler TS, Flajolet  
994 M, Greengard P, Stavarache M, Kaplitt MG, Rosinski J, Chan CS, Surmeier DJ (2014)  
995 Impaired TrkB receptor signaling underlies corticostriatal dysfunction in Huntington's  
996 disease. *Neuron* 83:178-188.
- 997 Qian H, Kang X, Hu J, Zhang D, Liang Z, Meng F, Zhang X, Xue Y, Maimon R, Dowdy SF,  
998 Devaraj NK, Zhou Z, Mobley WC, Cleveland DW, Fu XD (2020) Reversing a model of  
999 Parkinson's disease with in situ converted nigral neurons. *Nature* 582:550-556.
- 1000 Reidling JC et al. (2018) Human Neural Stem Cell Transplantation Rescues Functional Deficits in  
1001 R6/2 and Q140 Huntington's Disease Mice. *Stem cell reports* 10:58-72.
- 1002 Reiner A, Shelby E, Wang H, Demarch Z, Deng Y, Guley NH, Hogg V, Roxburgh R, Tippett LJ,  
1003 Waldvogel HJ, Faull RL (2013) Striatal parvalbuminergic neurons are lost in Huntington's  
1004 disease: implications for dystonia. *Mov Disord* 28:1691-1699.
- 1005 Saudou F, Humbert S (2016) The Biology of Huntingtin. *Neuron* 89:910-926.
- 1006 Sepers MD, Smith-Dijak A, LeDue J, Kolodziejczyk K, Mackie K, Raymond LA (2018)  
1007 Endocannabinoid-Specific Impairment in Synaptic Plasticity in Striatum of Huntington's  
1008 Disease Mouse Model. *J Neurosci* 38:544-554.
- 1009 Sivarajah S, Raj GS, Mathews AJ, Sahib NB, Hwang WS, Crook JM (2010) The generation of  
1010 GLP-grade human embryonic stem cell banks from four clinical-grade cell lines for  
1011 preclinical research. *In vitro cellular & developmental biology Animal* 46:210-216.
- 1012 Southwell AL, Smith-Dijak A, Kay C, Sepers M, Villanueva EB, Parsons MP, Xie Y, Anderson  
1013 L, Felczak B, Walzl S, Ko S, Cheung D, Dal Cengio L, Slama R, Petoukhov E, Raymond  
1014 LA, Hayden MR (2016) An enhanced Q175 knock-in mouse model of Huntington disease  
1015 with higher mutant huntingtin levels and accelerated disease phenotypes. *Hum Mol Genet*  
1016 25:3654-3675.



- 1017 Tabrizi SJ, Ghosh R, Leavitt BR (2019) Huntingtin Lowering Strategies for Disease Modification  
1018 in Huntington's Disease. *Neuron* 101:801-819.
- 1019 Tepper JM, Koos T, Ibanez-Sandoval O, Tecuapetla F, Faust TW, Assous M (2018) Heterogeneity  
1020 and Diversity of Striatal GABAergic Interneurons: Update 2018. *Front Neuroanat* 12:91.
- 1021 The Huntington's Disease Collaborative Research Group (1993) A novel gene containing a  
1022 trinucleotide repeat that is expanded and unstable on Huntington's disease chromosomes.  
1023 *Cell* 72:971-983.
- 1024 Vonsattel JP, DiFiglia M (1998) Huntington disease. *J Neuropathol Exp Neurol* 57:369-384.
- 1025 Wagner L, Bjorkqvist M, Lundh SH, Wolf R, Borgel A, Schlenzig D, Ludwig HH, Rahfeldt JU,  
1026 Leavitt B, Demuth HU, Petersen A, von Horsten S (2016) Neuropeptide Y (NPY) in  
1027 cerebrospinal fluid from patients with Huntington's Disease: increased NPY levels and  
1028 differential degradation of the NPY1-30 fragment. *J Neurochem* 137:820-837.
- 1029 Waldvogel HJ, Kim EH, Tippett LJ, Vonsattel JP, Faull RL (2015) The Neuropathology of  
1030 Huntington's Disease. *Current topics in behavioral neurosciences* 22:33-80.
- 1031 Walker RH, Moore C, Davies G, Dirling LB, Koch RJ, Meshul CK (2012) Effects of subthalamic  
1032 nucleus lesions and stimulation upon corticostriatal afferents in the 6-hydroxydopamine-  
1033 lesioned rat. *PLoS One* 7:e32919.
- 1034 Wu Z, Parry M, Hou XY, Liu MH, Wang H, Cain R, Pei ZF, Chen YC, Guo ZY, Abhijeet S, Chen  
1035 G (2020) Gene therapy conversion of striatal astrocytes into GABAergic neurons in mouse  
1036 models of Huntington's disease. *Nature communications* 11:1105.
- 1037 Yoon Y, Kim HS, Hong CP, Li E, Jeon I, Park HJ, Lee N, Pei Z, Song J (2020) Neural Transplants  
1038 From Human Induced Pluripotent Stem Cells Rescue the Pathology and Behavioral Defects  
1039 in a Rodent Model of Huntington's Disease. *Frontiers in neuroscience* 14:558204.
- 1040
